1 EffectorK, a comprehensive resource to mine for pathogen effector targets in  
2 the Arabidopsis proteome

3  
4 Manuel González-Fuente<sup>1¶</sup>, Sébastien Carrère<sup>1¶</sup>, Dario Monachello<sup>2,3</sup>, Benjamin G. Marsella<sup>4</sup>,  
5 Anne-Claire Cazalé<sup>1</sup>, Claudine Zischek<sup>1</sup>, Raka M. Mitra<sup>5</sup>, Nathalie Rezé<sup>2,3</sup>, Ludovic Cottret<sup>1</sup>, M.  
6 Shahid Mukhtar<sup>4</sup>, Claire Lurin<sup>2,3</sup>, Laurent D. Noël<sup>1\*</sup> and Nemo Peeters<sup>1\*</sup>

7 <sup>1</sup> Laboratoire des Interactions Plantes Micro-organismes (LIPM), INRAE, CNRS, Université de  
8 Toulouse, F-31326 Castanet-Tolosan, France

9 <sup>2</sup> Institut des Sciences des Plantes de Paris Saclay (IPS2), UEVE, INRAE, CNRS, Université Paris  
10 Sud, Université Paris-Saclay, F-91192 Gif-sur-Yvette, France

11 <sup>3</sup> Université de Paris, IPS2, F-91192 Gif-sur-Yvette, France

12 <sup>4</sup> Department of Biology, University of Alabama at Birmingham, 1300 University Blvd.,  
13 Birmingham, AL 35294, USA

14 <sup>5</sup> Department of Biology, Carleton College, One North College Street, Northfield, MN 55057,  
15 USA

16 \* Corresponding authors

17 E-mail: [nemo.peeters@inra.fr](mailto:nemo.peeters@inra.fr) (NP) and [laurent.noel@inra.fr](mailto:laurent.noel@inra.fr) (LDN)

18 ¶These authors contributed equally to this work.

## 19 **Abstract**

20 Pathogens deploy effector proteins that interact with host proteins to manipulate the host  
21 physiology to the pathogen's own benefit. However, effectors can also be recognized by host  
22 immune proteins leading to the activation of defense responses. Effectors are thus essential  
23 components in determining the outcome of plant-pathogen interactions. Despite major efforts to  
24 decipher effector functions, our current knowledge on effector biology is scattered and often  
25 limited. In this study, we conducted two systematic large-scale yeast two-hybrid screenings to  
26 detect interactions between *Arabidopsis thaliana* proteins and effectors from two vascular bacterial  
27 pathogens: *Ralstonia pseudosolanacearum* and *Xanthomonas campestris*. We then constructed an  
28 interactomic network focused on Arabidopsis and effector proteins from a wide variety of  
29 bacterial, oomycete, fungal and animal pathogens. This network contains our experimental data  
30 and protein-protein interactions from 2,035 peer-reviewed publications (48,200 Arabidopsis-  
31 Arabidopsis and 1,300 Arabidopsis-effector protein interactions). Our results show that effectors  
32 from different species interact with both common and specific Arabidopsis targets suggesting dual  
33 roles as modulators of generic and adaptive host processes. Network analyses revealed that effector  
34 targets, particularly effector hubs and bacterial core effector targets, occupy important positions  
35 for network organization as shown by their larger number of protein interactions and centrality.  
36 These interactomic data were incorporated in EffectorK, a new graph-oriented knowledge database  
37 that allows users to navigate the network, search for homology or find possible paths between host  
38 and/or effector proteins. EffectorK is available at [www.effectork.org](http://www.effectork.org) and allows users to submit  
39 their own interactomic data.

## 40 **Author summary**

41 Plant pests and diseases caused by bacteria, oomycetes, fungi or animals are threatening  
42 food security worldwide. Understanding how these pathogens infect and manipulate the host is  
43 key to develop sustainable crop resistance in the long term. Effector proteins are secreted by  
44 pathogens to subvert the host immune responses. The roles of several effector proteins have been  
45 described; however, it is yet poorly understood how effectors interact with host proteins at a global  
46 level. To address this issue, we have generated EffectorK, an interactive database focused on the  
47 model plant species *Arabidopsis thaliana*. This database contains manually curated Arabidopsis-  
48 effector protein interactions from the available literature on a wide variety of pathogens. It also  
49 contains new experimental data on effectors from two vascular pathogens: *Ralstonia*  
50 *pseudosolanacearum* and *Xanthomonas campestris*. This work integrates all the gathered  
51 knowledge over the last decades and allows to identify general patterns of how effectors interact  
52 with the host proteome. This knowledge is easily accessible and searchable at [www.effectork.org](http://www.effectork.org).

## 53 **Introduction**

54 Plants are continuously confronted with a wide variety of pathogens including bacteria,  
55 oomycetes, fungi, nematodes and insects. To prevent their proliferation, plants have evolved a  
56 complex multilayered immune system [1]. The first layer of defense corresponds to constitutive  
57 physical and chemical barriers such as the cuticle, cell wall or secondary metabolites [2,3]. Plants  
58 are also able to recognize highly conserved pathogen-associated molecular patterns (PAMPs)  
59 through pattern-recognition receptors triggering induced defense responses collectively known as

60 ‘PAMP-triggered immunity’ (PTI) [4]. These responses are usually enough to prevent most  
61 potential invaders; however, some pathogens secrete effector proteins to subvert the defense  
62 responses and alter diverse cellular processes to ease their proliferation [5]. Plants, on the other  
63 hand, have evolved several intracellular nucleotide-binding site-leucine-rich repeat (NBS-LRR)  
64 receptors recognizing these effectors and activating potent defense responses collectively known  
65 as ‘effector-triggered immunity’ (ETI) [6].

66 Although the targets and molecular functions of some effectors have been well  
67 characterized [7–10], for most effectors they are still unknown. The main factors complicating the  
68 large-scale identification and characterization of effector-host protein interactions are: the wide  
69 diversity of pathosystems, the difficulty to identify *bona fide* effector genes, the collective  
70 contribution of effector proteins, the complexity of the host responses and the lack of robust high  
71 throughput techniques. For the model species *Arabidopsis thaliana* (*Ath*), to our knowledge, there  
72 are only two studies in which systematic effector-host protein interactions at the effectome-scale  
73 have been identified [11,12]. In these studies plant targets of effector proteins from *Pseudomonas*  
74 *syringae* (*Psy*, bacterium), *Hyaloperonospora arabidopsidis* (*Hpa*, oomycete) and *Glovinomyces*  
75 *orontii* (*Gor*, fungus) were identified by yeast two-hybrid (Y2H). They reported that the effectors  
76 of these three species converged onto a limited set of *Ath* proteins. These studies also demonstrated  
77 that many effector targets are important for plant immunity and showed that their importance  
78 correlates with the level of effector convergence.

79 Bacterial wilt, caused by *Ralstonia pseudosolanacearum* (*Ralstonia solanacearum*  
80 phylotype I, *Rps*), and black rot, caused by *Xanthomonas campestris* pathovar *campestris* (*Xcc*)

81 are listed among the top five plant bacterial diseases in the world [13]. Both *Rps* and *Xcc* are  
82 xylem-colonizing pathogens and rely on their type III secretion systems for full virulence [14,15].  
83 This ‘molecular syringe’ allows the pathogen to deliver type III effector proteins (T3Es) directly  
84 into the host cell in order to promote disease. The roles of several of their T3Es have been  
85 characterized [16,17], but most knowledge on T3E functions comes from the study of *Psy*, which  
86 resides on leaf surfaces and in the leaf apoplast [7,18]. Focusing mainly on a few species offers a  
87 partial view of effector biology. It is therefore crucial to expand our studies to other species to  
88 grasp most of the existing diversity of effector proteins and pathogen lifestyles.

89 To obtain a deeper understanding of the global *Ath*-effector protein interactome, we  
90 conducted two systematic large-scale screenings with T3Es from *Rps* and *Xcc*, the first vascular  
91 pathogens screened in this manner. Additionally, we conducted an extensive literature survey to  
92 gather published *Ath* targets of effector proteins from pathogens from four different kingdoms of  
93 life: Bacteria, Chromista, Fungi and Animalia. Combining all these data allowed us to identify 100  
94 new ‘effector hubs’ (i.e., *Ath* proteins interacting with two or more effectors). Together with *Ath*-  
95 *Ath* protein interactions retrieved from public databases, we generated a comprehensive *Ath*-  
96 effector protein network that captures the wide diversity of *Ath* pathogens. This network allowed  
97 us to detect general trends of effector interference with the host proteome. We have created a  
98 publicly available interactive knowledge database called EffectorK (for Effector Knowledge)  
99 which allows users to access and augment this network.

## 100 **Results**

### 101 **Systematic identification of Arabidopsis targets of *R. pseudosolanacearum* and *X. campestris*** 102 **effectors.**

103 Multiple Y2H screenings were performed to identify *Ath* targets of *Rps* and *Xcc* effector  
104 proteins. In a first screening, we identified 42 *Ath* targets for 21 out of 56 T3Es from *Rps* strain  
105 GMI100 screened against a library of more than 8,000 full-length *Ath* cDNAs (8K space). In the  
106 second and third screenings, we identified 176 *Ath* targets for 32 out of 48 T3Es from *Rps* strain  
107 GMI1000 and 52 *Ath* targets for 18 out of 25 T3Es from *Xcc* strain 8004 screened against an  
108 extended version of the previous library containing more than 12,000 *Ath* full-length cDNAs (12K  
109 space) (S1 Fig and S1 Table). On average, T3Es from *Rps* interacted with 10.7 *Ath* proteins while  
110 T3Es from *Xcc* interacted with 5.3 *Ath* proteins. These *Ath* cDNA libraries had been previously  
111 used to test interactions with effector proteins from *Hpa*, *Psy* (8K space) and *Gor* (12K space)  
112 [11,12]. The subset of interactions of effectors from *Rps*, *Xcc* and *Gor* in the 8K space was used  
113 to compare with previously published *Hpa* and *Psy* data (Fig 1). In general, *Rps* effectors interacted  
114 on average with more *Ath* proteins than the other screened species; however, this difference is only  
115 statistically significant when compared to *Gor* effectors (one-tailed Wilcoxon signed-rank test p-  
116 value = 0.0005). These data show that effector proteins from these five different species, on  
117 average, tend to interact with a similar number of *Ath* proteins regardless the kingdom, lifestyle or  
118 effectome size.

## 119 **Effectors converge onto a limited set of Arabidopsis proteins**

120 We compared the *Rps* and *Xcc* effector targets identified in our screenings with the targets  
121 previously identified for *Hpa*, *Psy* and *Gor* effector proteins [11,12]. To avoid bias related to the  
122 size of the screened library, we considered only the subset of effector targets present in the 8K  
123 space (S2 Fig). At the kingdom level, the highest target specificity was found in Bacteria with 158  
124 exclusive out of a total of 217 targets (72.8%) followed by Chromista, with 31 out of 117 (51.7%),  
125 and Fungi, with 16 out of 45 (35.6%). In total, 235 out of 299 effector targets (78.6%) were  
126 kingdom-specific. At the species level, when comparing all five pathogens, the percentage of  
127 exclusive targets was 58.9% for *Psy*, 58.7% for *Rps*, 51.7% for *Hpa*, 48.8% for *Xcc* and 35.6% for  
128 *Gor*. The total number of species-specific effector targets was 221 out of 299 (73.9%). These data  
129 show that most effector targets are kingdom- and species-specific.

130 To evaluate whether *Rps* and *Xcc* effectors interact randomly or converge onto a common  
131 set of *Ath* protein we performed simulations rewiring effector-*Ath* protein interactions. In these  
132 simulations, each effector was assigned randomly as many *Ath* proteins as it had interacted with  
133 in our screenings. Then, the number of targets found on all simulations was plotted and compared  
134 with the experimental data (Fig 2A). The number of effector targets observed in our screenings  
135 was significantly lower than the numbers obtained in the random simulations for both *Rps* and  
136 *Xcc*. Similar results had been reported for effectors from *Hpa*, *Psy* and *Gor* [11,12]. This shows  
137 that, similarly to other species, both *Rps* and *Xcc* effectors also interact with a common subset of  
138 *Ath* proteins (i.e., intraspecific convergence).

139           These random rewiring simulations also allowed us to determine whether effectors from  
140 different species interact randomly or convergently with *Ath* proteins. For this, the number of  
141 common interactors of effectors from different species was compared with the experiment data  
142 (Fig 2B). When comparing all three kingdoms, the number of common targets observed was  
143 significantly higher than expected by random rewiring. We then analyzed all possible binary,  
144 ternary, quaternary and quinary combinations of species and in all cases, the number of common  
145 targets observed was higher than expected randomly (Fig 2C). These differences were all  
146 statistically significant except for the common targets of effectors from *Psy* and *Xcc* (p-value =  
147 0.0579) (S3 Fig). This could indicate that these two species are the most different in terms of  
148 effector targeting. However, considering that *Psy* and *Xcc* are precisely the two species with the  
149 lowest number of effectors for which targets have been identified (*Psy*: 32 and *Xcc*: 18 effector  
150 proteins), it is likely that the high p-value is caused by the limited sample size. This shows that  
151 effectors from all these five species interact with a common subset of *Ath* proteins (i.e.,  
152 interspecific convergence).

153           Altogether, our data indicate that *Rps* and *Xcc* effectors converge both intra- and  
154 interspecifically onto a set of limited *Ath* proteins, behaving similarly to effectors from other  
155 previously screened pathogen species. This suggests the existence of a convergent set of effector  
156 targets common to evolutionary distant pathogens that might have a predominant role in the  
157 general modulation of the host responses.

158   **Manual curation of the literature to gather new Arabidopsis-effector protein interactions**



159           In order to gather more knowledge on *Ath*-effector protein interactions, we conducted an  
160 extensive literature search compiling data from a wider spectrum of bacterial, fungal, oomycete  
161 and animal effector proteins. We only considered published direct protein-protein interactions that  
162 had been confirmed by classic techniques such as Y2H, co-immunoprecipitation, pull-down,  
163 protein-fragment complementation, fluorescence resonance energy transfer or mass spectrometry.  
164 We compiled 287 interactions found in 80 peer-reviewed publications involving 218 *Ath* proteins  
165 and 72 effectors from 22 pathogen species (S2 Table). Among these 22 pathogens, there were nine  
166 bacterial species, mostly proteobacteria but also a phytoplasma species; eight animal species  
167 including both nematodes and insects; four oomycete and one fungal species. While this collection  
168 of species does not represent the full diversity of *Ath* pathogens, it covers the majority of pathogens  
169 for which effector targets have been found. We can notice that despite being one of the major  
170 pathogen classes, few studies have described fungal effector interactors. This illustrates one of the  
171 current gaps in our knowledge of effector targets.

## 172 **Identification of 100 new effector hubs**

173           To compare experimental and published data, we combined all the interactions curated  
174 from the published data together with data from our large-scale Y2H screenings. This resulted in  
175 a total of 564 different *Ath* proteins targeted by pathogen effectors. Our screenings on *Rps* and *Xcc*  
176 effectors identified 235 targets. Similar published screenings on *Psy*, *Gor* or *Hpa* effectors had  
177 identified 200 targets [11,12]. The literature curation allowed us to identify 218 effector targets.  
178 From the 235 *Rps* and *Xcc* effectors targets found in our screening, 166 were new which represents  
179 29.4% of the total targets compiled in this study (Fig 3). This highlights the potential of such

180 systematic and high throughput large-scale screenings in identifying novel effector targets. The  
181 average effector degree (i.e., number of effectors interacting with an *Ath* protein) was 2.3 but it  
182 was unevenly distributed among the 564 targets with 350 of them interacting with only one effector  
183 (62%) and 14 interacting with more than 10 effectors (2.5%) (S4 Fig). The contribution of our  
184 experimental data was important in the identification of single targets as we identified 93 out of  
185 the 350 (26.6%). More remarkable was our contribution in the identification of “effector hubs”,  
186 what we defined as *Ath* proteins interacting with two or more effectors (Fig 4). The definition of  
187 hub has been debated and it has been traditionally associated with proteins that are highly  
188 connected in interactomic networks [19]. Our definition of “effector hub” came from the need to  
189 designate the *Ath* proteins that interact with several effectors and is based exclusively on the  
190 number of interacting effector proteins. We identified 100 new effector hubs and increased the  
191 degree of 42 previously described effector hubs (S3 Table).

192         To evaluate the potential relevance of the newly identified effector hubs in plant immunity,  
193 we conducted a second literature survey to check if the corresponding *Ath* genes had been  
194 previously characterized to be involved in plant immunity or pathogen fitness *in planta* (Table 1).  
195 16 out of the 100 new effector hub genes, have already been described for their altered infection  
196 or other immunity-related phenotype when mutated, silenced or overexpressed. Additionally, the  
197 orthologs of 3 other new hubs in other plant species, also produced altered infection phenotypes  
198 when silenced or overexpressed. A total of 19 out of the 100 newly identified effector hubs have  
199 already been shown to be involved in biotic stress responses. Considering that many of the  
200 remaining newly defined effector hubs have been poorly characterized (e.g., hypothetical proteins

201 or descriptions based on homology or belonging to a protein family), it is likely that the number  
 202 of effector hubs involved in immunity was underestimated. This constitutes a valuable source of  
 203 novel candidates for further functional characterization.

204 **Table 1. List of 19 new effector hubs involved in plant immunity.**

| <b>Effector hub</b>    | <b>Protein name</b>                                        | <b>Effector degree<sup>a</sup></b> | <b>Description of observed phenotype</b>                                                                                                                 | <b>Reference</b> |
|------------------------|------------------------------------------------------------|------------------------------------|----------------------------------------------------------------------------------------------------------------------------------------------------------|------------------|
| AT1G58100              | TCP domain protein<br>8 (TCP8)                             | 13                                 | Triple <i>tcp8 tcp14 tcp15</i> mutant showed enhanced <i>Pseudomonas syringae</i> strain DC3000 $\Delta$ <i>avrRps4</i> growth.                          | [20]             |
| AT1G71230 <sup>b</sup> | COP9-signalosome<br>5B (CSN5B)                             | 8                                  | Wheat <i>TaCSN5</i> mutant showed enhanced disease symptoms caused by <i>Puccinia triticina</i> .                                                        | [21]             |
| AT3G12920              | BOI-related gene 3<br>(BRG3)                               | 7                                  | <i>brg3</i> mutant showed increased <i>Botrytis cinerea</i> lesion size.                                                                                 | [22]             |
| AT5G08330 <sup>b</sup> | TCP domain protein<br>21 (TCP21)                           | 7                                  | Rice <i>OsTCP21</i> silenced and overexpressing plants showed enhanced and reduced disease symptoms caused by rice rust stunt virus (RRSV) respectively. | [23]             |
| AT5G61010              | Exocyst subunit<br>EXO70 family<br>protein E2<br>(EXO70E2) | 6                                  | <i>exo70e2</i> mutant showed reduced flg22-induced callose deposition.                                                                                   | [24]             |

|                        |                                           |   |                                                                                                                                                         |      |
|------------------------|-------------------------------------------|---|---------------------------------------------------------------------------------------------------------------------------------------------------------|------|
| AT4G00270              | STOREKEEPER-related 1 (STKR1)             | 6 | <i>STKR1</i> overexpressing plants showed reduced <i>Hyaloperonospora arabidopsidis</i> spore formation.                                                | [25] |
| AT3G01670              | SIEVE ELEMENT OCLUSSION-related 2 (SEOR2) | 4 | <i>Myzus persicae</i> feeding from <i>seor2</i> mutant showed reduced progeny.                                                                          | [26] |
| AT5G17490              | RGA-like protein 3 (RGL3)                 | 3 | <i>rgl3</i> mutant showed reduced <i>P. syringae</i> growth and increased SA content upon infection.                                                    | [27] |
| AT3G54230              | Suppressor of <i>abi3-5</i> (SUA)         | 3 | <i>sua</i> mutant showed enhanced <i>P. syringae</i> growth and reduced chitin-induced ROS production.                                                  | [28] |
| AT3G11410              | Protein phosphatase 2CA (PP2CA)           | 3 | <i>pp2ca</i> mutant showed reduced <i>P. syringae</i> colonization and stomatal aperture. <i>PP2CA</i> overexpressor showed enhanced stomatal aperture. | [29] |
| AT2G17290              | Calcium-dependent protein kinase 6 (CPK6) | 3 | Double <i>cpk5-cpk6</i> mutant showed enhanced <i>P. syringae</i> growth and reduced flg22-induced ROS production.                                      | [30] |
| AT5G41410 <sup>b</sup> | Homeobox protein BEL1 homolog (BELL1)     | 3 | Rice <i>OsBIHD1</i> mutant and overexpressing plants showed increased and reduced <i>Magnaporthe oryzae</i> lesion area respectively.                   | [31] |
| AT4G26750              | LYST-interacting protein 5 (LIP5)         | 2 | <i>lip5</i> mutant showed enhanced <i>P. syringae</i> growth and disease symptoms and reduced endosomal structure formation upon infection.             | [32] |

|           |                                           |   |                                                                                                                                                                                        |      |
|-----------|-------------------------------------------|---|----------------------------------------------------------------------------------------------------------------------------------------------------------------------------------------|------|
| AT4G35090 | Catalase-2 (CAT2)                         | 2 | <i>cat2</i> mutant showed increased ROS accumulation upon infection with incompatible <i>P. syringae</i> strain.                                                                       | [33] |
| AT3G02870 | Inositol-phosphate phosphatase (VTC4)     | 2 | <i>vtc4</i> mutant showed reduced <i>P. syringae</i> growth.                                                                                                                           | [34] |
| AT5G53060 | Regulator of CBF gene expression 3 (RCF3) | 2 | <i>rcf3</i> mutant showed reduced percentage of diseased plants and higher percentage of plant survival upon <i>Fusarium oxysporum</i> infection.                                      | [35] |
| AT3G02540 | RAD23 family protein C (RAD23C)           | 2 | <i>rad23BCD</i> mutant (and not <i>rad23BD</i> ) did not show <i>Candidatus Phytoplasma</i> -induced flower virescence and phyllody.                                                   | [36] |
| AT5G38470 | RAD23 family protein D (RAD23D)           | 2 | <i>rad23D</i> mutant did not show flower virescence and phyllody upon transgenic expression of <i>C. Phytoplasma</i> SAP54 effector.                                                   | [36] |
| AT2G37630 | Asymmetric leaves 1 (AS1)                 | 2 | <i>as1</i> mutant showed reduced lesion size caused by <i>B. cinerea</i> and <i>Alternaria brassicicola</i> and enhanced <i>Pseudomonas fluorescens</i> and <i>P. syringae</i> growth. | [37] |

---

205 <sup>a</sup> Ranked in decreasing order.

206 <sup>b</sup> Orthologous gene in other plant species, as defined by EnsemblPlants [38], characterized for a  
 207 role in immunity.

208           In terms of organism of origin, most of the 564 targets are bacterial effector targets as it  
209 could be expected considering that 132 out of the 266 total effectors compiled came from bacteria  
210 (S4 Fig). In the case of effector hubs, it is noteworthy that 133 out of the 214 hubs described in  
211 this work are targeted by effectors from a single kingdom while there are only 64, 16 and 1 hubs  
212 interacting with effectors from 2, 3 or 4 different kingdoms respectively. Although biased by the  
213 structure of the data, this could suggest kingdom specificity of effector targeting.

#### 214 **Effector targets tend to occupy key positions for the network organization**

215           We constructed an *Ath*-effector protein interaction network compiling the previously  
216 described experimental and literature-compiled data with *Ath-Ath* protein interactions from public  
217 databases and the literature [39–42]. From the total of 49,500 interactions compiled in this study,  
218 48,597 were grouped into a single connected component constituting what we defined as our *Ath*-  
219 effector interactomic network (Table S4). This network was constituted of 47,314 *Ath-Ath* and  
220 1,283 *Ath*-effector protein interactions between 8,036 *Ath* proteins and 245 effector proteins.  
221 Effectors came from 23 different species including bacteria (128 effectors), oomycetes (61  
222 effectors), fungi (46 effectors) and animals (10 effectors). The uneven distribution of effectors  
223 among kingdoms highlights the contribution of the large-scale screenings in the identification of  
224 effector targets as 1,002 out of 1,283 *Ath*-effector protein interactions came from either our  
225 experimental data or previous screenings of the same library [11,12].

226           To further investigate the potential impact of effectors on the plant interactome, we  
227 evaluated the importance of their targets for the organization of the network. We focused on two  
228 main network topology parameters: degree and betweenness centrality (Fig 4). The degree of a  
14

229 protein represents the number of proteins that it interacts with. In this study we differentiated two  
230 types of degrees depending on the nature of the interacting proteins: the *Ath* degree of a given  
231 effector or *Ath* protein (i.e., number of interacting *Ath* proteins) and effector degree for a given *Ath*  
232 protein (i.e., number of interacting effector proteins). The betweenness centrality of a protein is  
233 the fraction of all shortest paths connecting two proteins from the network that pass through it.  
234 There are two main types of key proteins in a network [43]: 1) proteins important for local network  
235 organization, typically showing high degree, and 2) proteins important for the global diffusion of  
236 the information through the network, characterized by high betweenness centrality. It had been  
237 previously reported in more limited networks that effectors tend to target host proteins with high  
238 degree and centrality [43–45]. We then analyzed whether this was the case in our network  
239 comparing effector targets with the rest of the *Ath* proteins (Fig 5). The fraction of proteins  
240 decreased rapidly as the *Ath* degree increased. This indicates that most *Ath* proteins present low  
241 *Ath* degree and only a few of them show high *Ath* degree values. This tendency was significantly  
242 shifted towards higher *Ath* degree values in effector targets compared to the rest of *Ath* proteins.  
243 To represent this tendency shift we estimated and compared the area under the curve values of the  
244 cumulative distribution of *Ath* degree for effector targets and the rest of *Ath* proteins (Table 2).  
245 Effectively, the area under the curve value of effector targets was higher than the value of the rest  
246 of *Ath* proteins. This indicates that effector targets present generally higher *Ath* degree than the  
247 rest of *Ath* proteins. Similarly, we compared the betweenness centrality of these two groups of  
248 proteins (Table 2 and Fig S5). Effector targets also presented significantly higher betweenness  
249 centrality values than the rest of *Ath* proteins. Altogether, these results indicate that effectors

250 preferentially interact with *Ath* proteins that are more connected to other *Ath* proteins and that  
 251 occupy more central positions in the interactomic network.

252 **Table 2. Cumulative *Ath* and effector degrees and betweenness centrality of different groups**  
 253 **of effector targets**

|                        | Area under the curve <sup>a</sup>      |                                           | Figure <sup>b</sup> | p-value <sup>c</sup> |
|------------------------|----------------------------------------|-------------------------------------------|---------------------|----------------------|
|                        | <b>Effector targets</b>                | <b>Other <i>Ath</i> proteins</b>          |                     |                      |
| <i>Ath</i> degree      | 2,737                                  | 1,010                                     | 5                   | < 0.0001             |
| Betweenness centrality | 0.23                                   | 0.033                                     | S5A                 | < 0.0001             |
|                        | <b>Multi-pathogen effector targets</b> | <b>Pathogen-specific effector targets</b> |                     |                      |
| <i>Ath</i> degree      | 5,344                                  | 1,790                                     | S5B                 | < 0.0001             |
| Betweenness centrality | 0.657                                  | 0.136                                     | S5C                 | < 0.0001             |
|                        | <b>Effector hubs</b>                   | <b>Single effector targets</b>            |                     |                      |
| <i>Ath</i> degree      | 4,067                                  | 1,810                                     | S5D                 | < 0.0001             |
| Betweenness centrality | 0.407                                  | 0.118                                     | S5E                 | < 0.0001             |
|                        | <b>Bacterial core T3Es</b>             | <b>Rest of bacterial T3Es</b>             |                     |                      |
| <i>Ath</i> degree      | 656                                    | 712                                       | S7A                 | 0.4571               |
| Betweenness centrality | 0.072                                  | 0.074                                     | S7B                 | 0.9198               |
|                        | <b>Targets of bacterial core T3Es</b>  | <b>Other bacterial T3Es targets</b>       |                     |                      |
| Effector degree        | 347                                    | 123                                       | S7C                 | < 0.0001             |
| <i>Ath</i> degree      | 3,610                                  | 2,714                                     | S7D                 | 0.0131               |
| Betweenness centrality | 0.369                                  | 0.239                                     | S7E                 | 0.0007               |

254 <sup>a</sup> Estimated area under the curve of the cumulative distribution of *Ath* degree, effector degree and  
 255 betweenness centrality for each group of proteins as represented in figures 5, S5 and S7. Estimation  
 256 based on numerical integration using Simpson's Rule.



257 <sup>b</sup> Figure illustrating the cumulative distribution graphic from which the areas under the curve  
258 compared were calculated.

259 <sup>c</sup> One-tailed Wilcoxon signed-rank test p-value of the comparison of the *Ath* degree, effector  
260 degree or betweenness centrality values of all proteins from each compared group.

261 We then wanted to test if the *Ath* degree and betweenness centrality values differed among  
262 distinct types of effector targets (Table 2 and Fig S5). First we compared multi-pathogen and  
263 pathogen-specific targets as previously described (S2 Fig). Multi-pathogen effector targets  
264 presented significantly higher *Ath* degree and betweenness centrality compared to pathogen-  
265 specific effector targets. We also compared effector hubs with single effector targets. Similarly,  
266 effector hubs also showed higher betweenness centrality and *Ath* degree than single effector  
267 interactors. This last observation implies that an *Ath* protein that interacts with several effectors  
268 tends to interact with more *Ath* proteins as well. To evaluate whether this is biologically relevant  
269 or a bias of the ‘stickiness’ of a protein, we compared the *Ath* and effector degree values of all  
270 targets. Our results showed that these two parameters are not correlated (Pearson correlation  
271 coefficient = 0.3221) (S6 Fig). This suggests that effector hubs interact with more *Ath* proteins  
272 than single effector targets and not because they might be stickier.

273 In this work, by compiling our experimental interactomic data on *Xcc* and *Rps* and the  
274 literature-curated interactions from a wide variety of other pathogen effectors, we extended the  
275 notion that effectors tend to privilege interactions with host proteins with higher *Ath* degree and  
276 betweenness centrality [43,45]. Furthermore, we showed that this tendency is stronger among  
277 effector hubs compared to single targets and among multi-pathogen effector targets compared to

278 pathogen-specific targets. This reflects the importance of interfering with these key position  
279 proteins in the modulation of host-pathogen interactions.

### 280 **Bacterial core T3Es interact with more connected and central *Ath* proteins**

281 Our work on *Rps* and *Xcc* together with previous work on *Psy* T3Es [11] provided a large  
282 amount of interactomic data on bacterial pathogen species for which other resources have been  
283 generated, particularly in terms of abundance and diversity of sequenced genomes and thus curated  
284 T3E repertoires [18,46–50]. The most conserved set of T3Es, or ‘core effectome’, from each of  
285 the three bacterial species has been previously defined [47,48,50]. We then tested whether these  
286 subsets of T3Es behaved differently from the rest of bacterial T3Es in terms of interaction with  
287 host proteins (Table 2 and Fig S7). Our data showed that core and variable T3Es from the three  
288 species do not differ in *Ath* degree nor betweenness centrality. We then tested if there were any  
289 differences between the network properties of the targets of core T3Es and the other bacterial T3E  
290 targets. Core T3Es targets showed higher effector degree, *Ath* degree and betweenness centrality  
291 than the rest of targets of bacterial T3Es. This suggests that, although core T3Es in general do not  
292 have more targets than the rest of bacterial T3Es, they do interact with more highly connected and  
293 central *Ath* proteins. This might imply that core T3Es have a larger potential to interfere with the  
294 host interactome what could explain the selective pressure to maintain them in the majority of  
295 strains.

296 **EffectorK, an online interactive knowledge database to explore the Arabidopsis-effector**  
297 **interactomic data**

298 In order to facilitate the access and exploration of all the data presented in this work, we  
299 have generated EffectorK (for ‘Effector Knowledge’), an interactive web-based knowledge  
300 database freely available at [www.effectork.org](http://www.effectork.org). The latest version (October 2, 2019) contains  
301 49,875 interactions 8,617 proteins coming from 2,035 publications. From these, 1,300 are *Ath*-  
302 effector protein interactions. Searches can be done based on a wide range of supported identifiers  
303 such as different protein names, NCBI or TAIR accession numbers, PubMed identifiers and  
304 InterPro terms. Additionally, users can also query nucleotide or amino acid sequences directly with  
305 BLAST or use accession numbers from other model and crop plants to find homologs within the  
306 database. All proteins found by query are then listed in tabular format and hyperlinked to the  
307 corresponding interactomic data, external resources and amino acid sequences. Interactomic data  
308 for a given protein can be then explored and downloaded in graphical or tabular format. The visual  
309 interface for the graphical representation of the interactomic data allows users to expand or re-  
310 center a local subnetwork based on a given protein, get information and access to external  
311 resources linked to either a protein (node) or an interaction (edge) or modify the layout and the  
312 position of the elements for optimal visualization. Additionally, EffectorK also allows users to find  
313 the shortest paths between two queried proteins in the network.

314 In order to update, expand and further improve EffectorK, we encourage users to submit  
315 their own interactomic data by filing in and sending the dedicated template. These data will be  
316 verified by the curator team prior to their incorporation in the database. More information about

317 usage, content and data submission is accessible online, under the tabs ‘Help’ and ‘Contribute’ of  
318 the database web server. Please contact us if you have any question or suggestions by email at  
319 [contact@effectork.org](mailto:contact@effectork.org).

## 320 **Discussion**

321 In this study we identified systematically *Ath* targets of effectors from the vascular bacterial  
322 pathogens *Rps* and *Xcc*. We combined this information with other *Ath* targets identified in similar  
323 experimental setups. Additionally, we conducted an extensive literature review to gather published  
324 *Ath* targets of effectors from a wide variety of pathogens including other bacterial species and also  
325 oomycete, fungal and animal pathogens. Studying this combined interactomic dataset allowed us  
326 to identify new trends of how effectors interfere with the plant proteome and evaluate whether  
327 previously described network principles were still supported on a wider scale. We showed that  
328 there are no substantial differences in terms of connectivity among the effectomes of five different  
329 pathogen species screened systematically (Fig 1). We have reinforced previously described intra-  
330 and interspecific convergence of effector targeting with effectors from two new species [11,12],  
331 and showed at the same time that most effector targets are pathogen specific (Fig 2 and S2). Our  
332 analyses also supported the previously described tendency of effectors to interact with plant  
333 proteins better connected and central in the network [43,45], and showed that this tendency is even  
334 stronger among effector hubs, multi-pathogen targets and bacterial core T3E targets (Table 2 and  
335 Fig S5).

## 336 **The balance between target specificity and convergence**

337 Our data showed that most effector targets were pathogen-specific (S2 Fig) but at the same  
338 time, effectors converge interspecifically onto a small subset of *Ath* proteins (Fig 2B-C). These *a*  
339 *priori* contradictory observations open an interesting question: what is the balance between  
340 specificity and convergence of effector targets? At this point, it is impossible to assert whether this  
341 specificity is merely caused by the limited number of pathogens screened at the effectome-scale  
342 or if it is a reflection of the different and unique ways that each pathogen has evolved to interfere  
343 with the host physiology and immunity. This issue can only be addressed by increasing the number  
344 of pathogen effectors screened thoroughly and at a large-scale. Comparing large datasets of  
345 effector targets of a wider and more diverse set of pathogens would allow evaluating in which  
346 sense this balance between specificity and convergence tilts: 1) If the target specificity decreased,  
347 it would mean that the effectomes from the different pathogens tend to interact similarly with the  
348 host proteome. This was the case when we compared the percentage of species-specific targets of  
349 effectors from *Hpa*, *Psy* and *Gor* that passed from being 73.9%, 64.9% and 46.7% in previous  
350 works [11,12], to 51.7%, 58.9% and 35.6%, respectively in the present study (S2 Fig).  
351 Nevertheless, a total of five screened species is probably not powerful enough to sustain this claim.  
352 2) If, on the contrary, the target specificity increased with the number of screened species, it would  
353 mean that the different pathogens have evolved unique ways to modulate the interaction with the  
354 host. If this were be the case, deeper analyses comparing related pathogens (e.g., species with  
355 similar lifestyle or from the same kingdom) could allow identifying trait-specific targets (e.g.,  
356 effector targets exclusive among vascular pathogen effectors). In any case, to better understand the

357 similarities and particularities on how effectors modulate host processes, it is essential to increase  
358 the number of pathogen species screened for effector targets at the effectome-scale.

### 359 **Large-scale screenings fill the gap in the identification of effector targets**

360 Including manually curated data from literature has allowed us to broaden significantly the  
361 diversity of plant pathogen species compared to similar studies. However, 346 out the 564  
362 described *Arabidopsis* effector targets have been identified exclusively through large-scale Y2H  
363 screenings against partial libraries of *Ath* cDNAs. As with any other large-scale screening, the  
364 technical limitations together with the incompleteness of the library might have probably led to an  
365 underestimation of the plant-effector interactome of the five screened species [51]. The relatively  
366 small overlap between the large-scale Y2H screenings and manually curated literature datasets  
367 might be a consequence of this limitation (Fig 3). This small overlap illustrates the current  
368 knowledge gap in the characterization of the full plant interactome of pathogen effectors.  
369 Extensive work will be required to characterize further effector-host protein interactions in other  
370 pathosystems. As one of the simplest yet powerful high throughput techniques for protein-protein  
371 interaction detection, our work, like others before, highlights the potential of such large-scale Y2H  
372 screenings in the identification of novel effector targets in an easy, cheap and systematic manner.

### 373 **EffectorK, an entry point to explore and make sense of plant-effector interactomics**

374 To conclude, our work also provides valuable resources for the plant-pathogen interaction  
375 community. We described 540 new *Ath-Rps* and *Ath-Xcc* effector protein interactions that allowed  
376 us to identify 166 new effector targets (S1 Table). We also manually curated several publications  
377 to assemble a collection of 287 *Ath*-effector protein interactions from a wide variety of pathogens

378 (S2 Table). All this, allowed us to identify 100 novel effector hubs (S3 Table). The contribution to  
379 plant immunity of these effector hubs has been described for 19 of them, but remains untested for  
380 the majority (Table 1). This constitutes a list of promising candidates for further functional  
381 characterization. All these data were integrated in EffectorK, a knowledge database where users  
382 can have easy access to the *Ath*-effector protein interactions and explore the resulting interactomic  
383 network visually and interactively. While major efforts were done to capture the maximal diversity  
384 on the pathogen side, we limited our work to the Arabidopsis plant model. Thanks to the built-in  
385 homology search tools available, users can also use their own data as query regardless of the  
386 species studied. It is therefore feasible to use EffectorK as a starting point to build on and extend  
387 to crop plant-effector protein interactomics. In the long term, these data could be exploited to better  
388 understand how pathogens interact with these crops with the prospect of selecting breeding  
389 candidates for improved tolerance or resistance against pathogens.

## 390 **Materials and Methods**

### 391 **Cloning of *Rps* and *Xcc* T3E genes**

392 All the cloning of the T3E genes from *Rps* and *Xcc* was performed by BP gateway BP or  
393 TOPO cloning (Thermo Fisher Scientific), to generate pENTRY plasmids, which were later  
394 transferred into the appropriate Y2H plasmids [11], using the LR gateway reaction (Thermo Fisher  
395 Scientific). S5 Table contains all the PCR primers and final plasmid identities describing the  
396 collection of plasmids used in this study. Gene sequence information from *Rps* strain GMI1000

397 can be obtained from [www.ralsto-T3E.org](http://www.ralsto-T3E.org) [47] and from the published genome of *Xcc* strain 8004  
398 [52].

### 399 **Y2H screenings**

400 The Y2H screening was performed in semi-liquid ('8K space' screening) and liquid ('12K  
401 space' screening) media as recently reported [53], which is an adaptation of a previously developed  
402 Y2H-solid pipeline [54]. In both protocols the same low copy number yeast expression vectors  
403 and the two yeast strains, *Saccharomyces cerevisiae* Y8930 and Y8800, were used. The expression  
404 of the *GALI-HIS3* reporter gene was tested with 1 mM 3AT (3-amino-1,2,4-triazole, a competitive  
405 inhibitor of the HIS3 gene product), unless described otherwise. Prior to Y2H screening, DB-X  
406 strains were tested for auto-activation of the *GALI-HIS3* reporter gene in the absence of AD-Y  
407 plasmid. In case of auto-activation, DB-X were physically removed from the collection of baits  
408 and screened against the (DB)-*Ath*-cDNA collections using their AD-X constructs. Briefly, DB-X  
409 baits expressing yeasts were individually grown (30°C for 72 hours) into 50-ml polypropylene  
410 conical tubes containing 5 ml of fresh selective media (Sc-Leucine, Sc-Leu). Pools were created  
411 by mixing a maximum of 72 and 50 individual bait yeast strains for the '8K space' and '12K space'  
412 respectively. Subsequently, 120 µl and 50 µl of these individual pools were plated into 96-well  
413 and 384-well low profile microplates for *Ath*-cDNA '8K space' and '12K space' collections  
414 respectively. Glycerol stocks of the (AD)-*Ath*-cDNA '8K space' and '12K space' collections were  
415 thawed, replicated by handpicking or using a colony picker Qpix2 XT into 96-well and 384-well  
416 plates filled with 120 µl and 50 µl of fresh selective media (Sc-Tryptophan; Sc-Trp) respectively,  
417 and incubated at 30°C for 72 hours. Culture plates corresponding to the DB-baits pools and AD-



418 collection were replicated into mating plates filled with YEPD media and incubated at 30°C for  
419 24 hours. In liquid Y2H case ('12K space' screening), mating plates were then replicated into  
420 screening plates filled with 50 µl of fresh Sc-Leu-Trp-Histidine + 1 mM 3AT media and incubated  
421 at 30°C for 5 days. In order to identify primary positives, the OD<sub>600</sub> of the 384-well screening  
422 plates was measured using a microplate-reader Tecan Infinite M200 PRO. In semi-liquid Y2H  
423 case ('8K space' screening), mated yeast were spotted onto Sc-Leu-Trp-Histidine + 1 mM 3AT  
424 media agar plates, and incubated at 30 °C for 3 days. Protein pairs were identified by depooling  
425 of DB-baits in a similar targeted matricial liquid or semi-liquid assays in which all the DB-baits  
426 were individually tested against all the previously identified AD-proteins. Identified pairs were  
427 picked and checked by PCR and DNA sequencing.

#### 428 **Database content and manual curation**

429 Binary interactions between *Ath* proteins with each other and with pathogen effector  
430 proteins were compiled on tabular form keeping track of the protein names and accessions, species  
431 and ecotypes/strains of origin, techniques used to detect the interactions and the reference. *Ath-Ath*  
432 protein interactions were compiled from the Arabidopsis Interactome [41,42] and the public  
433 databases BioGrid ([www.thebiogrid.org](http://www.thebiogrid.org) [39]; downloaded in September 2019) and IntAct  
434 ([www.ebi.ac.uk/intact](http://www.ebi.ac.uk/intact) [40]; downloaded in September 2019). We only kept the direct interactions  
435 with the evidence codes 'co-crystal structure', 'FRET' (fluorescence resonance energy transfer),  
436 'PCA' (protein-fragment complementation assay), 'reconstituted complex' or 'two-hybrid' on  
437 BioGrid and 'physical association' on IntAct. *At*-effector protein interactions were gathered from  
438 our experimental Y2H data together with the similarly produced data on *Hpa*, *Psy* and *Gor*

439 effectors [11,12]. In addition, an extensive keyword search on effector-Arabidopsis literature was  
440 done to retrieve interactions from 80 published articles. A confidence level was assigned to each  
441 interaction depending on the number of independent techniques used in a publication for  
442 validation: “1” if the interaction was detected by only one technique and “2” if the interaction was  
443 validated by at least a second technique. Some interactions lacked important information but, in  
444 order to maximize the extent of our network, several assumptions were taken instead of discarding  
445 useful data. First, gene models for *Ath* proteins were rarely mentioned on publications so we  
446 assumed the first gene model available on the latest version of the Arabidopsis genome (Araport11  
447 [55]). Secondly, when the ecotype/strain of the organism was not explicitly stated, a generic ‘NA’  
448 (not available) was assigned.

#### 449 ***In silico* analyses**

450 **Computational simulations of random targeting of *Ath* proteins by single pathogen effectors**  
451 **(intraspecific convergence).** Significance of the intraspecific convergence was tested comparing  
452 our experimental data with random simulations as previously published [12]. Briefly, for each  
453 effector of *Xcc* and *Rps* we assigned randomly the same number of *Ath* targets as experimentally  
454 observed from the degree-preserved list of 8K proteins. The distribution obtained from 10,000  
455 simulations was plotted and compared to the experimentally obtained data. The p-value of the  
456 experimental data was calculated as follows: number of simulations where the number of targets  
457 is lower or equal than experimentally observed is divided by the number of simulations. When the  
458 number of simulations with less targets than observed was zero, the p-value was set to  $< 0.001$ .

$$459 \quad p - value = \frac{\text{number of simulations where the number of interactors} \leq \text{experimentally observed number of interactors}}{\text{number of simulations}} \quad (1)$$

460 **Computational simulations of random targeting of *Ath* proteins by several pathogen**  
461 **effectors (interspecific convergence).** Significance of the interspecific convergence was tested  
462 comparing our experimental data and previously published data with random simulations as  
463 published [11,12]. Briefly, for each effector of all compared pathogens we assigned the same  
464 number of *Ath* targets as experimentally observed/published from the list of 8K proteins. The  
465 distribution obtained from 10,000 simulations was plotted and compared to experimentally and  
466 published data. The p-value of the experimental data was calculated as follows: number of  
467 simulations where the number of common targets between species was higher or equal than the  
468 experimentally observed is divided by the number of simulations. When the number of simulations  
469 with more common targets than observed was zero, the p-value was set to < 0.001.

$$470 \quad p - value = \frac{\text{number of simulations where the number of common interactors} \geq \text{experimentally observed number of common interactors}}{\text{number of simulations}} \quad (2)$$

471 **Overlap of effector targets.** The overlaps of effector targets between the different kingdoms and  
472 species were calculated taking into account the targets found in the different large-scale screening  
473 and limiting to the 8K space. For representation of the data, Venn diagrams were generated using  
474 the Venn Diagrams tool from VIB-UGent Center for Plant Systems Biology  
475 ([www.bioinformatics.psb.ugent.be/webtools/Venn/](http://www.bioinformatics.psb.ugent.be/webtools/Venn/)). The overlap of effector targets from the  
476 different datasets was calculated not limiting to any limited space. For an area-proportional  
477 representation of the data, a Venn diagram was generated using BioVenn [56].

478 **Network topology analyses.** The topology parameters of the *Ath*-effector interactomic network  
479 were calculated on Cytoscape 3.7.2 [57]. Our analyses focused on two key node parameters: degree  
480 and betweenness centrality. The degree of a protein is a measure of its connectivity and denotes  
481 the number of proteins interacting with it. Throughout this work, we have differentiated two kinds  
482 of degrees: 1) effector degree (i.e., number of interacting effector proteins) and 2) *Ath* degree (i.e.,  
483 number of interacting *Ath* proteins). The betweenness centrality measures the proportion of  
484 shortest pathways between two proteins that passes through a given node. These parameters were  
485 compared against different subset of data and statistical tests were performed in R language [58].  
486 The cumulative distribution of these parameters among different subset of data was plotted and  
487 the area under the curve was estimated using Simpson's rule with the 'Bolstad2' package [59].

#### 488 **Database construction**

489 The database was built using the software architecture recently described [60]. The files  
490 submitted by the curator team were automatically checked for typographic mistakes using *ad-hoc*  
491 Perl scripts and loaded into a Neo4J database and indexed in an ElasticSearch search engine. Each  
492 release was rebuilt from scratch. Data were made accessible through a web interface (see Results  
493 and discussion section) built upon Cytoscape.js library [61]. The raw data used for the database  
494 setup are available in the 'Data' section of [www.effectork.org](http://www.effectork.org) and the source code is available at  
495 <https://framagit.org/LIPM-BIOINFO/KGBB>.

## 496 **Acknowledgments**

497           We wish to thank Alberto Macho and Laurent Deslandes for the contribution of RipS3, and RipP1  
498 and RipP2 containing plasmids. We thank colleagues (Corinne Audran, Julien Luneau, Effectome and FNX  
499 network members) for their critical opinion on our work.

## 500 **References**

- 501 1. Jones JDG, Dangl JL. The plant immune system. *Nature*. 2006;444: 323–9.  
502 doi:10.1038/nature05286
- 503 2. Osbourn AE. Preformed Antimicrobial Compounds and Plant Defense against Fungal  
504 Attack. *Plant Cell*. 1996;8: 1821–1831. doi:10.1105/tpc.8.10.1821
- 505 3. Hamann T. Plant cell wall integrity maintenance as an essential component of biotic stress  
506 response mechanisms. *Front Plant Sci*. 2012;3. doi:10.3389/fpls.2012.00077
- 507 4. Zipfel C. Plant pattern-recognition receptors. *Trends Immunol*. 2014;35: 345–51.  
508 doi:10.1016/j.it.2014.05.004
- 509 5. Ma W, Wang Y, McDowell J. Focus on Effector-Triggered Susceptibility. *Mol Plant-  
510 Microbe Interact*. 2018;31: 5–5. doi:10.1094/MPMI-11-17-0275-LE
- 511 6. Cui H, Tsuda K, Parker JE. Effector-Triggered Immunity: From Pathogen Perception to  
512 Robust Defense. *Annu Rev Plant Biol*. 2015;66: 487–511. doi:10.1146/annurev-arplant-  
513 050213-040012
- 514 7. Büttner D. Behind the lines-actions of bacterial type III effector proteins in plant cells.

- 515 FEMS Microbiol Rev. 2016;40: 894–937. doi:10.1093/femsre/fuw026
- 516 8. Sharpee WC, Dean RA. Form and function of fungal and oomycete effectors. Fungal Biol  
517 Rev. 2016;30: 62–73. doi:10.1016/j.fbr.2016.04.001
- 518 9. Giron D, Huguet E, Stone GN, Body M. Insect-induced effects on plants and possible  
519 effectors used by galling and leaf-mining insects to manipulate their host-plant. J Insect  
520 Physiol. 2016;84: 70–89. doi:10.1016/j.jinsphys.2015.12.009
- 521 10. Vieira P, Gleason C. Plant-parasitic nematode effectors — insights into their diversity and  
522 new tools for their identification. Curr Opin Plant Biol. 2019;50: 37–43.  
523 doi:10.1016/j.pbi.2019.02.007
- 524 11. Mukhtar MS, Carvunis A-R, Dreze M, Epple P, Steinbrenner J, Moore J, et al.  
525 Independently evolved virulence effectors converge onto hubs in a plant immune system  
526 network. Science. 2011;333: 596–601. doi:10.1126/science.1203659
- 527 12. Weßling R, Epple P, Altmann S, He Y, Yang L, Henz SR, et al. Convergent targeting of a  
528 common host protein-network by pathogen effectors from three kingdoms of life. Cell Host  
529 Microbe. 2014;16: 364–375. doi:10.1016/j.chom.2014.08.004
- 530 13. Mansfield J, Genin S, Magori S, Citovsky V, Sriariyanum M, Ronald P, et al. Top 10 plant  
531 pathogenic bacteria in molecular plant pathology. Mol Plant Pathol. 2012;13: 614–29.  
532 doi:10.1111/j.1364-3703.2012.00804.x
- 533 14. Genin S, Denny TP. Pathogenomics of the *Ralstonia solanacearum* species complex. Annu  
534 Rev Phytopathol. 2012;50: 67–89. doi:10.1146/annurev-phyto-081211-173000

- 535 15. Büttner D, Bonas U. Regulation and secretion of *Xanthomonas* virulence factors. FEMS  
536 Microbiol Rev. 2010;34: 107–33. doi:10.1111/j.1574-6976.2009.00192.x
- 537 16. White FF, Potnis N, Jones JB, Koebnik R. The type III effectors of *Xanthomonas*. Mol Plant  
538 Pathol. 2009;10: 749–66. doi:10.1111/j.1364-3703.2009.00590.x
- 539 17. Coll NS, Valls M. Current knowledge on the *Ralstonia solanacearum* type III secretion  
540 system. Microb Biotechnol. 2013;6: 614–20. doi:10.1111/1751-7915.12056
- 541 18. Lindeberg M, Cunnac S, Collmer A. *Pseudomonas syringae* type III effector repertoires:  
542 last words in endless arguments. Trends Microbiol. 2012;20: 199–208.  
543 doi:10.1016/j.tim.2012.01.003
- 544 19. Vandereyken K, Van Leene J, De Coninck B, Cammue BPA. Hub Protein Controversy:  
545 Taking a Closer Look at Plant Stress Response Hubs. Front Plant Sci. 2018;9: 694.  
546 doi:10.3389/fpls.2018.00694
- 547 20. Kim SH, Son GH, Bhattacharjee S, Kim HJ, Nam JC, Nguyen PDT, et al. The Arabidopsis  
548 immune adaptor SRRF1 interacts with TCP transcription factors that redundantly contribute  
549 to effector-triggered immunity. Plant J. 2014;78: 978–89. doi:10.1111/tpj.12527
- 550 21. Zhang H, Wang X, Giroux MJ, Huang L. A wheat COP9 subunit 5-like gene is negatively  
551 involved in host response to leaf rust. Mol Plant Pathol. 2017;18: 125–133.  
552 doi:10.1111/mpp.12467
- 553 22. Luo H, Laluk K, Lai Z, Veronese P, Song F, Mengiste T. The Arabidopsis Botrytis  
554 Susceptible1 Interactor defines a subclass of RING E3 ligases that regulate pathogen and

- 555 stress responses. *Plant Physiol.* 2010;154: 1766–82. doi:10.1104/pp.110.163915
- 556 23. Zhang C, Ding Z, Wu K, Yang L, Li Y, Yang Z, et al. Suppression of Jasmonic Acid-  
557 Mediated Defense by Viral-Inducible MicroRNA319 Facilitates Virus Infection in Rice.  
558 *Mol Plant.* 2016;9: 1302–1314. doi:10.1016/j.molp.2016.06.014
- 559 24. Redditt TJ, Chung E-H, Zand Karimi H, Rodibaugh N, Zhang Y, Trinidad JC, et al.  
560 *AvrRpm1* Functions as an ADP-Ribosyl Transferase to Modify NOI-domain Containing  
561 Proteins, Including Arabidopsis and Soybean RPM1-interacting Protein 4. *Plant Cell.* 2019;  
562 tpc.00020.2019. doi:10.1105/tpc.19.00020
- 563 25. Nietzsche M, Guerra T, Alseekh S, Wiermer M, Sonnewald S, Fernie AR, et al.  
564 *STOREKEEPER RELATED1/G-Element Binding Protein (STKR1)* Interacts with Protein  
565 Kinase SnRK1. *Plant Physiol.* 2018;176: 1773–1792. doi:10.1104/pp.17.01461
- 566 26. Anstead JA, Froelich DR, Knoblauch M, Thompson GA. Arabidopsis P-protein filament  
567 formation requires both *AtSEOR1* and *AtSEOR2*. *Plant Cell Physiol.* 2012;53: 1033–42.  
568 doi:10.1093/pcp/pcs046
- 569 27. Li Y, Yang Y, Hu Y, Liu H, He M, Yang Z, et al. *DELLA* and *EDS1* Form a Feedback  
570 Regulatory Module to Fine-Tune Plant Growth-Defense Tradeoff in Arabidopsis. *Mol*  
571 *Plant.* 2019;12: 1485–1498. doi:10.1016/j.molp.2019.07.006
- 572 28. Zhang Z, Liu Y, Ding P, Li Y, Kong Q, Zhang Y. Splicing of receptor-like kinase-encoding  
573 *SNC4* and *CERK1* is regulated by two conserved splicing factors that are required for plant  
574 immunity. *Mol Plant.* 2014;7: 1766–75. doi:10.1093/mp/ssu103



- 575 29. Lim CW, Luan S, Lee SC. A prominent role for RCAR3-mediated ABA signaling in  
576 response to *Pseudomonas syringae* pv. tomato DC3000 infection in Arabidopsis. *Plant Cell*  
577 *Physiol.* 2014;55: 1691–703. doi:10.1093/pcp/pcu100
- 578 30. Boudsocq M, Willmann MR, McCormack M, Lee H, Shan L, He P, et al. Differential innate  
579 immune signalling via Ca(2+) sensor protein kinases. *Nature.* 2010;464: 418–22.  
580 doi:10.1038/nature08794
- 581 31. Liu H, Dong S, Gu F, Liu W, Yang G, Huang M, et al. NBS-LRR Protein Pik-H4 Interacts  
582 with OsBIHD1 to Balance Rice Blast Resistance and Growth by Coordinating Ethylene-  
583 Brassinosteroid Pathway. *Front Plant Sci.* 2017;8: 127. doi:10.3389/fpls.2017.00127
- 584 32. Wang F, Shang Y, Fan B, Yu J-Q, Chen Z. Arabidopsis LIP5, a positive regulator of  
585 multivesicular body biogenesis, is a critical target of pathogen-responsive MAPK cascade  
586 in plant basal defense. Li X, editor. *PLoS Pathog.* 2014;10: e1004243.  
587 doi:10.1371/journal.ppat.1004243
- 588 33. Simon C, Langlois-Meurinne M, Bellvert F, Garmier M, Didierlaurent L, Massoud K, et al.  
589 The differential spatial distribution of secondary metabolites in Arabidopsis leaves reacting  
590 hypersensitively to *Pseudomonas syringae* pv. tomato is dependent on the oxidative burst.  
591 *J Exp Bot.* 2010;61: 3355–70. doi:10.1093/jxb/erq157
- 592 34. Mukherjee M, Larrimore KE, Ahmed NJ, Bedick TS, Barghouthi NT, Traw MB, et al.  
593 Ascorbic acid deficiency in arabidopsis induces constitutive priming that is dependent on  
594 hydrogen peroxide, salicylic acid, and the NPR1 gene. *Mol Plant Microbe Interact.* 2010;23:

595 340–51. doi:10.1094/MPMI-23-3-0340

596 35. Dagdas YF, Beihaj K, Maqbool A, Chaparro-Garcia A, Pandey P, Petre B, et al. An effector  
597 of the irish potato famine pathogen antagonizes a host autophagy cargo receptor. *Elife*.  
598 2016;5: 1–23. doi:10.7554/eLife.10856

599 36. MacLean AM, Orlovskis Z, Kowitwanich K, Zdziarska AM, Angenent GC, Immink RGH,  
600 et al. Phytoplasma effector SAP54 hijacks plant reproduction by degrading MADS-box  
601 proteins and promotes insect colonization in a RAD23-dependent manner. Wagner D,  
602 editor. *PLoS Biol*. 2014;12: e1001835. doi:10.1371/journal.pbio.1001835

603 37. Nurmberg PL, Knox KA, Yun B-W, Morris PC, Shafiei R, Hudson A, et al. The  
604 developmental selector AS1 is an evolutionarily conserved regulator of the plant immune  
605 response. *Proc Natl Acad Sci U S A*. 2007;104: 18795–800. doi:10.1073/pnas.0705586104

606 38. Kersey PJ, Allen JE, Allot A, Barba M, Boddu S, Bolt BJ, et al. Ensembl Genomes 2018:  
607 an integrated omics infrastructure for non-vertebrate species. *Nucleic Acids Res*. 2018;46:  
608 D802–D808. doi:10.1093/nar/gkx1011

609 39. Stark C, Breitkreutz B-J, Reguly T, Boucher L, Breitkreutz A, Tyers M. BioGRID: a general  
610 repository for interaction datasets. *Nucleic Acids Res*. 2006;34: D535-9.  
611 doi:10.1093/nar/gkj109

612 40. Orchard S, Ammari M, Aranda B, Breuza L, Briganti L, Broackes-Carter F, et al. The  
613 MIntAct project--IntAct as a common curation platform for 11 molecular interaction  
614 databases. *Nucleic Acids Res*. 2014;42: D358-63. doi:10.1093/nar/gkt1115

- 615 41. Dreze M, Carvunis A-R, Charlotteaux B, Galli M, Pevzner SJ, Tasan M, et al. Evidence for  
616 Network Evolution in an Arabidopsis Interactome Map. *Science*. 2011;333: 601–607.  
617 doi:10.1126/science.1203877
- 618 42. Smakowska-Luzan E, Mott GA, Parys K, Stegmann M, Howton TC, Layeghifard M, et al.  
619 An extracellular network of Arabidopsis leucine-rich repeat receptor kinases. *Nature*.  
620 2018;553: 342–346. doi:10.1038/nature25184
- 621 43. Li H, Zhou Y, Zhang Z. Network analysis reveals a common host–pathogen interaction  
622 pattern in Arabidopsis immune responses. *Front Plant Sci*. 2017;8: 893.  
623 doi:10.3389/fpls.2017.00893
- 624 44. Memišević V, Zavaljevski N, Rajagopala S V, Kwon K, Pieper R, DeShazer D, et al. Mining  
625 host-pathogen protein interactions to characterize *Burkholderia mallei* infectivity  
626 mechanisms. *PLoS Comput Biol*. 2015;11: e1004088. doi:10.1371/journal.pcbi.1004088
- 627 45. Ahmed H, Howton TC, Sun Y, Weinberger N, Belkhadir Y, Mukhtar MS. Network biology  
628 discovers pathogen contact points in host protein-protein interactomes. *Nat Commun*.  
629 2018;9: 2312. doi:10.1038/s41467-018-04632-8
- 630 46. Peeters N, Carrère S, Anisimova M, Plener L, Cazalé A-C, Genin S. Répertoire, unified  
631 nomenclature and evolution of the Type III effector gene set in the *Ralstonia solanacearum*  
632 species complex. *BMC Genomics*. 2013;14: 859. doi:10.1186/1471-2164-14-859
- 633 47. Sabbagh CRR, Carrere S, Lonjon F, Vailleau F, Macho AP, Genin S, et al. Pangenomic  
634 type III effector database of the plant pathogenic *Ralstonia* spp. *PeerJ*. 2019;7: e7346.

635 doi:10.7717/peerj.7346

636 48. Guy E, Genissel A, Hajri A, Chabannes M, David P, Carrere S, et al. Natural Genetic  
637 Variation of *Xanthomonas campestris* pv. *campestris* Pathogenicity on Arabidopsis  
638 Revealed by Association and Reverse Genetics. Guttman D, Ausubel FM, editors. MBio.  
639 2013;4. doi:10.1128/mBio.00538-12

640 49. Roux B, Bolot S, Guy E, Denancé N, Lautier M, Jardinaud MF, et al. Genomics and  
641 transcriptomics of *Xanthomonas campestris* species challenge the concept of core type III  
642 effectome. BMC Genomics. 2015;16. doi:10.1186/s12864-015-2190-0

643 50. Dillon MM, Almeida RND, Laflamme B, Martel A, Weir BS, Desveaux D, et al. Molecular  
644 Evolution of *Pseudomonas syringae* Type III Secreted Effector Proteins. Front Plant Sci.  
645 2019;10. doi:10.3389/fpls.2019.00418

646 51. Brückner A, Polge C, Lentze N, Auerbach D, Schlattner U. Yeast two-hybrid, a powerful  
647 tool for systems biology. Int J Mol Sci. 2009;10: 2763–88. doi:10.3390/ijms10062763

648 52. Qian W, Jia Y, Ren S-X, He Y-Q, Feng J-X, Lu L-F, et al. Comparative and functional  
649 genomic analyses of the pathogenicity of phytopathogen *Xanthomonas campestris* pv.  
650 *campestris*. Genome Res. 2005;15: 757–67. doi:10.1101/gr.3378705

651 53. Monachello D, Guillaumot D, Lurin C. A pipeline for systematic yeast 2-hybrid matricial  
652 screening in liquid culture. 2019. doi:10.21203/rs.2.9948/v1

653 54. Dreze M, Monachello D, Lurin C, Cusick ME, Hill DE, Vidal M, et al. High-Quality Binary  
654 Interactome Mapping. 2010. pp. 281–315. doi:10.1016/S0076-6879(10)70012-4

- 655 55. Cheng C-Y, Krishnakumar V, Chan AP, Thibaud-Nissen F, Schobel S, Town CD.  
656 Araport11: a complete reannotation of the *Arabidopsis thaliana* reference genome. *Plant J.*  
657 2017;89: 789–804. doi:10.1111/tpj.13415
- 658 56. Hulsen T, de Vlieg J, Alkema W. BioVenn - a web application for the comparison and  
659 visualization of biological lists using area-proportional Venn diagrams. *BMC Genomics.*  
660 2008;9: 488. doi:10.1186/1471-2164-9-488
- 661 57. Shannon P, Markiel A, Ozier O, Baliga NS, Wang JT, Ramage D, et al. Cytoscape: a  
662 software environment for integrated models of biomolecular interaction networks. *Genome*  
663 *Res.* 2003;13: 2498–504. doi:10.1101/gr.1239303
- 664 58. R Core Team. R: A language and environment for statistical computing Authors R Core  
665 Team. In: Vienna, Austria [Internet]. 2019. Available: <https://www.r-project.org/>
- 666 59. Bolstad WM. *Understanding Computational Bayesian Statistics*. Hoboken, NJ, USA: John  
667 Wiley & Sons, Inc.; 2009. doi:10.1002/9780470567371
- 668 60. Carrère S, Verdenaud M, Gough C, Gouzy J, Gamas P. LeGOO: An Expertized Knowledge  
669 Database for the Model Legume *Medicago truncatula*. *Plant Cell Physiol.* 2019.  
670 doi:10.1093/pcp/pcz177
- 671 61. Franz M, Lopes CT, Huck G, Dong Y, Sumer O, Bader GD. Cytoscape.js: a graph theory  
672 library for visualisation and analysis. *Bioinformatics.* 2016;32: 309–11.  
673 doi:10.1093/bioinformatics/btv557
- 674 62. Solé M, Popa C, Mith O, Sohn KH, Jones JDG, Deslandes L, et al. The awr Gene Family  
37

- 675 Encodes a Novel Class of *Ralstonia solanacearum* Type III Effectors Displaying Virulence  
676 and Avirulence Activities. *Mol Plant-Microbe Interact.* 2012;25: 941–953.  
677 doi:10.1094/MPMI-12-11-0321
- 678 63. Lonjon F, Lohou D, Cazalé A-C, Büttner D, Ribeiro BG, Péanne C, et al. HpaB-Dependent  
679 Secretion of Type III Effectors in the Plant Pathogens *Ralstonia solanacearum* and  
680 *Xanthomonas campestris* pv. *vesicatoria*. *Sci Rep.* 2017;7: 4879. doi:10.1038/s41598-017-  
681 04853-9
- 682 64. Remigi P, Anisimova M, Guidot A, Genin S, Peeters N. Functional diversification of the  
683 GALA type III effector family contributes to *Ralstonia solanacearum* adaptation on  
684 different plant hosts. *New Phytol.* 2011;192: 976–987. doi:10.1111/j.1469-  
685 8137.2011.03854.x
- 686 65. Wang K, Remigi P, Anisimova M, Lonjon F, Kars I, Kajava A, et al. Functional assignment  
687 to positively selected sites in the core type III effector RipG7 from *Ralstonia solanacearum*.  
688 *Mol Plant Pathol.* 2016;17: 553–64. doi:10.1111/mpp.12302
- 689 66. Deslandes L, Olivier J, Peeters N, Feng DX, Khounlotham M, Boucher C, et al. Physical  
690 interaction between RRS1-R, a protein conferring resistance to bacterial wilt, and PopP2, a  
691 type III effector targeted to the plant nucleus. *Proc Natl Acad Sci U S A.* 2003;100: 8024–  
692 8029. doi:10.1073/pnas.1230660100

## 693 **Supporting information**

694 **S1 Fig. *Ath* degree of T3E proteins from *Rps* strain GMI1000 and *Xcc* strain 8004.**

695 *Ath* degree (i.e., number of *Ath* targets per effector) in the in the 12,000 (12K space, light blue)  
696 and 8,000 *Ath* cDNA collections (8K space, dark blue) of T3E proteins from *Rps* strain GMI1000  
697 (A) and *Xcc* strain 8004 (B). For *Rps* strain GMI1000: in the first screening RipA3, RipAA,  
698 RipAB, RipAC, RipAG, RipAL, RipAM, RipAN, RipAO, RipAP, RipAQ, RipAR, RipAZ1,  
699 RipB, RipBA, RipG3, RipG4, RipG6, RipG7, RipH2, RipH3, RipI, RipK, RipM, RipN, RipO1,  
700 RipP1, RipQ, RipR, RipS2, RipS6, RipT, RipTPS, RipX and RipZ were screened but no targets  
701 were found. In the second screening RipAB, RipAC, RipAI, RipAX1, RipAY, RipBM, RipC1,  
702 RipE1, RipH1, RipN, RipR, RipS4, RipU, RipX and RipZ were screened but no targets were  
703 found, and RipAN and RipM could not be screened because of recalcitrant problems with yeast  
704 transformation. For *Xcc* strain 8004: AvrXccA2, HpaA, HrpW, XopAN, XopN and XopQ were  
705 screened but no targets were found, and AvrBs2, XopAH, XopAL2, XopD and XopE2 could not  
706 be screened because they showed autoactivation in yeast.

707 **S2 Fig. Overlap of *Ath* targets of effector proteins from *Hpa*, *Psy*, *Gor*, *Rps* and *Xcc*.**

708 Venn diagrams showing the overlap among *Ath* targets found in the 8,000-*Ath*-cDNA collection  
709 (8K space) of effector proteins from *Hpa*, *Psy*, *Gor*, *Rps* and *Xcc* at the kingdom (A) and species  
710 level (B). The total number of effector targets for each kingdom/species is indicated in brackets.

711 **S3 Fig. Interspecific convergence of *Psy* and *Xcc* effector proteins.**

712 Number of *Ath* targets in the 8K space of effectors from *Psy* and *Xcc* and *Rps* strain found in  
713 10,000 degree-preserving simulations (grey) versus the observed number (red arrow).

714 **S4 Fig. Effector degree distribution for *Ath* effector targets.**

715 Effector degree (i.e., number of effectors that interact with an *Ath* protein) distribution among the  
716 564 identified *Ath* effector targets (A), according to the origin the data: published large-scale  
717 screenings in light green, manual curation of literature in mid-green and this study in dark grey or  
718 (B), according to the kingdom of the corresponding effector pathogen: Bacteria in light blue,  
719 Chromista in dark blue, Fungi in light orange and Animalia in dark orange.

720 **S5 Fig. *Ath* degree and betweenness centrality of different groups of *Ath* effector targets.**

721 Cumulative distribution of *Ath* degree (B and D) and betweenness centrality (A, C and E) for *Ath*  
722 proteins targeted (orange) or not (purple) by effectors (B), multi-pathogen (green) and pathogen-  
723 specific (pink) effector targets (B and C) and effector hubs (red) and single effector targets (blue)  
724 (D and E). The significance of the differences were evaluated by one-tailed Wilcoxon signed-rank  
725 test. The illustration in the upper right corner of each graph represents each compared group:  
726 effectors are represented by squares, *Ath* proteins by circles, numbers represent different pathogens  
727 species and the color code matches the respective cumulative distribution graph. The estimation  
728 of the area under the curve of each distribution is compiled in Table 2.

729 **S6 Fig. *Ath* and effector degree of effector targets.**

730 (A) Scatterplot of *Ath* degree versus effector degree of all *Ath* effector targets. Squared in a grey  
731 dashed line is the close-up area represented in (B).

732 **S7 Fig. Degrees and betweenness centrality of bacterial core and non-core T3Es and their  
733 targets.**

734 Cumulative distribution of *Ath* degree (A and D), effector degree (C) and betweenness centrality  
735 (B and D) for bacterial core T3Es (yellow) and other bacterial T3Es (cyan) (A and B) and their



736 targets (brown and blue respectively) (C-E). The significance of the differences were evaluated by  
737 one-tailed Wilcoxon signed-rank test. The illustration in the upper right corner of each graph  
738 represents each compared group: bacterial T3Es are represented by squares, *Ath* proteins by circles  
739 and stars represents bacterial core T3Es. The estimation of the area under the curve of each  
740 distribution is compiled in Table 2.

741 **S1 Table. List of *Rps* and *Xcc* effector-*Ath* protein interactions detected experimentally in**  
742 **this study and composition of the *Ath*-cDNA screening libraries.**

743 **S2 Table. List of manually curated *Ath*-effector protein interactions from the literature.**

744 **S3 Table. List of effector hubs and single effector targets identified.**

745 **S4 Table. List of protein interactions constituting the *Ath*-effector interactomic network.**

746 **S5 Table. List of pENTRY for T3E genes from *Rps* and *Xcc*.**

## 747 **Figure captions**

748 **Fig 1. *Ath* degree of effector proteins from *Gor*, *Hpa*, *Psy*, *Xcc* and *Rps*.**

749 Comparison of the *Ath* degree (i.e., number of *Ath* targets per effector) of effector proteins from  
750 *Gor*, *Hpa*, *Psy*, *Xcc* and *Rps* found in the 8,000-*Ath*-cDNA collection (8K space). Horizontal black  
751 bars represent the median. Colors represent the kingdom (orange: Fungi, yellow: Chromista and  
752 blue: Bacteria).

753 **Fig 2. Effectors converge intra- and interspecifically onto a common set of *Ath* proteins.**

754 (A) Left: random and intraspecific convergent interactions of effectors (purple squares) with *Ath*  
755 proteins (green circles) can be distinguished by random network rewiring and simulation. Adapted  
756 from Weßling et al. [12]. Middle and right: number of *Ath* targets in the 8K space of effectors  
757 from *Xcc* strain 8004 and *Rps* strain GMI1000 found in 10,000 degree-preserving simulations  
758 (grey) versus the observed number (red arrow). (B) Left: random and interspecific convergent  
759 interactions of effectors from different species (purple and orange squares) with *Ath* proteins  
760 (green circles) can be distinguished by random network rewiring and simulation. Right: number  
761 of common *Ath* targets in the 8K space of effectors from Chromista, Bacteria and Fungi found in  
762 10,000 simulations (grey) versus the observed number (red arrow). (C) Scatterplot of observed  
763 versus simulated number of common *Ath* targets between all binary, ternary, quaternary and  
764 quinary combinations of species.  $x=y$  regression is represented with a dashed grey line.

765 **Fig 3. Overlap among effector targets depending on the origin of the dataset.**

766 Area-proportional Venn diagram showing the overlap among effector targets identified in the  
767 large-scale Y2H screenings performed in this study, in similar large-scale Y2H already published  
768 [11,12] and in the manual curation of the literature. The total number of effector targets coming  
769 from each dataset is indicated in brackets.

770 **Fig 4. Network topology parameters.**

771 Example of a simple interactomic network of three effector proteins (purple squares) and eight *Ath*  
772 proteins (green circles) to illustrate our definition of “effector hub” (i.e., *Ath* protein interacting  
773 with two or more effectors; highlighted in red) and the three network topology parameters analyzed  
774 in this study. 1) Effector degree: number of effectors that interact with a given *Ath* protein. 2) *Ath*

775 degree: number of *Ath* proteins that interact with a given effector or *Ath* protein. 3) Betweenness  
776 centrality: fraction of all shortest paths connecting two proteins from the network that pass through  
777 a given protein.

778 **Fig 5. *Ath* degree of *Ath* proteins targeted or not by effectors.**

779 Cumulative distribution of *Ath* degree of *Ath* proteins targeted (orange) or not (purple) by effectors.  
780 The significance of the difference was validated by one-tailed Wilcoxon signed-rank test. The  
781 illustration in the upper right corner represents each compared group. Effectors are represented by  
782 squares, *Ath* proteins by circles and the color code matches the cumulative distribution graph.



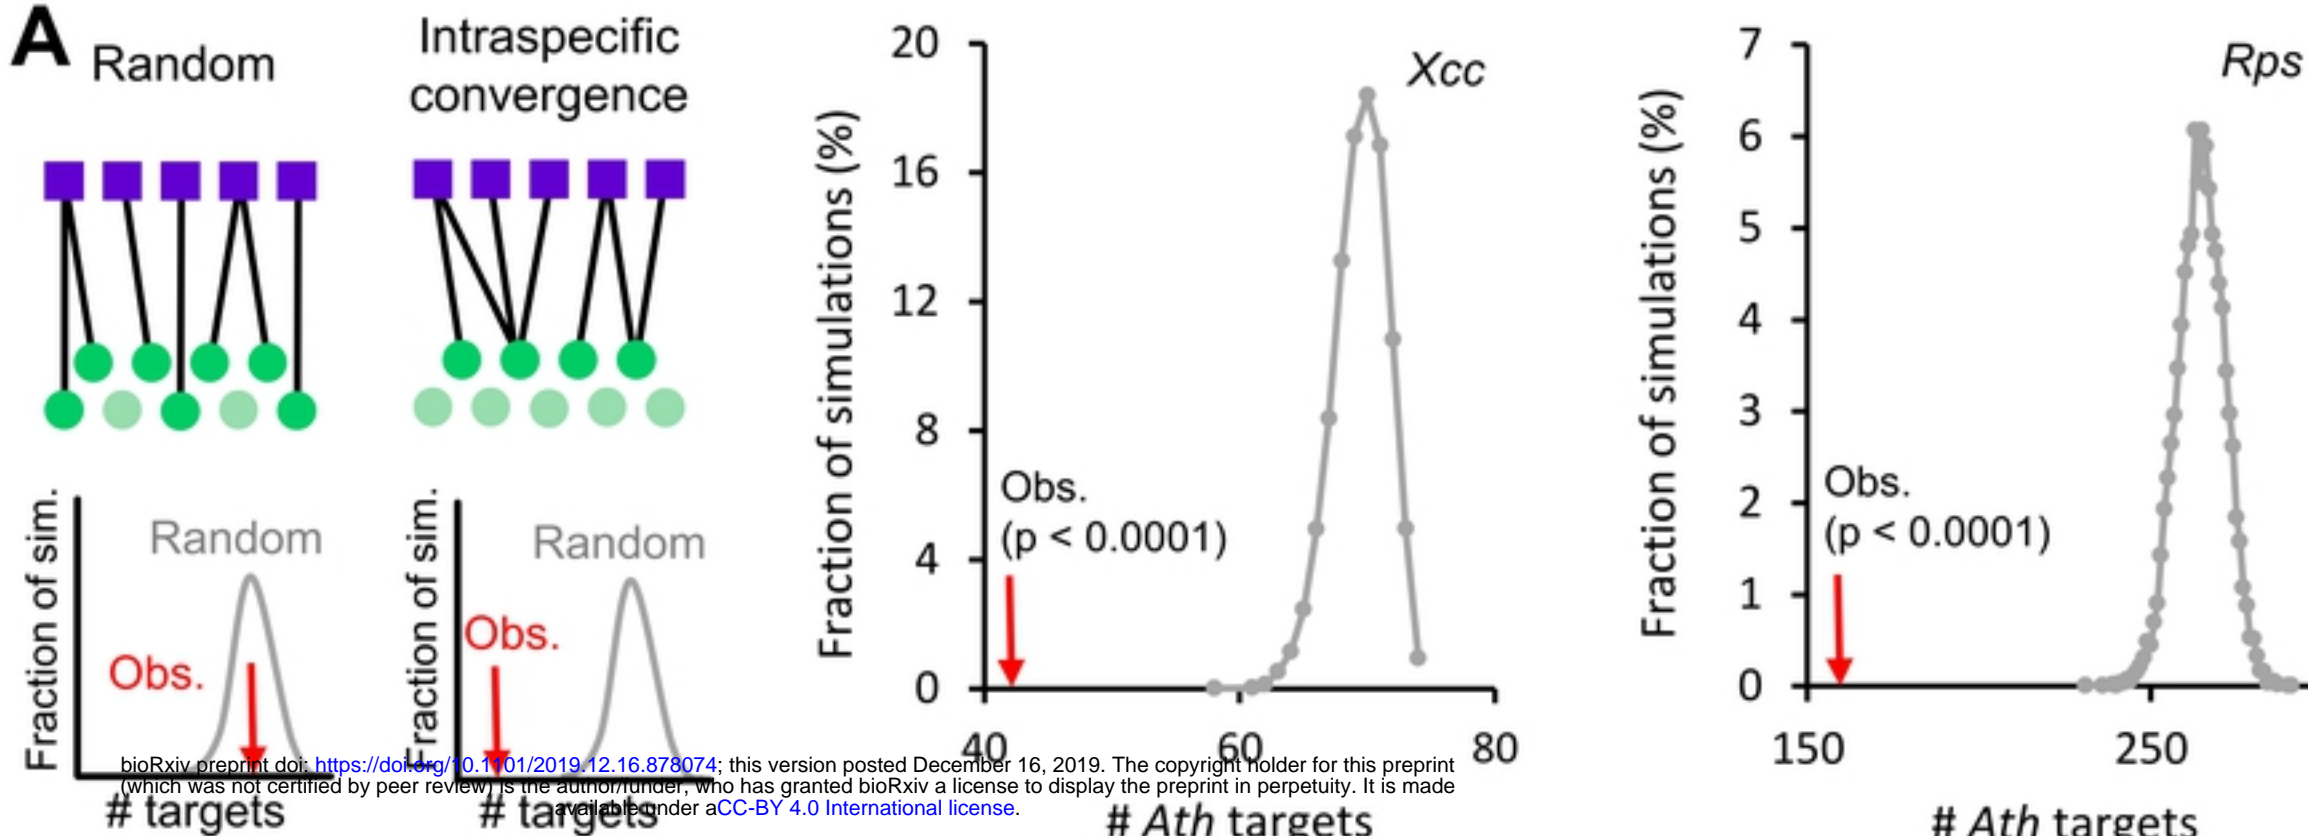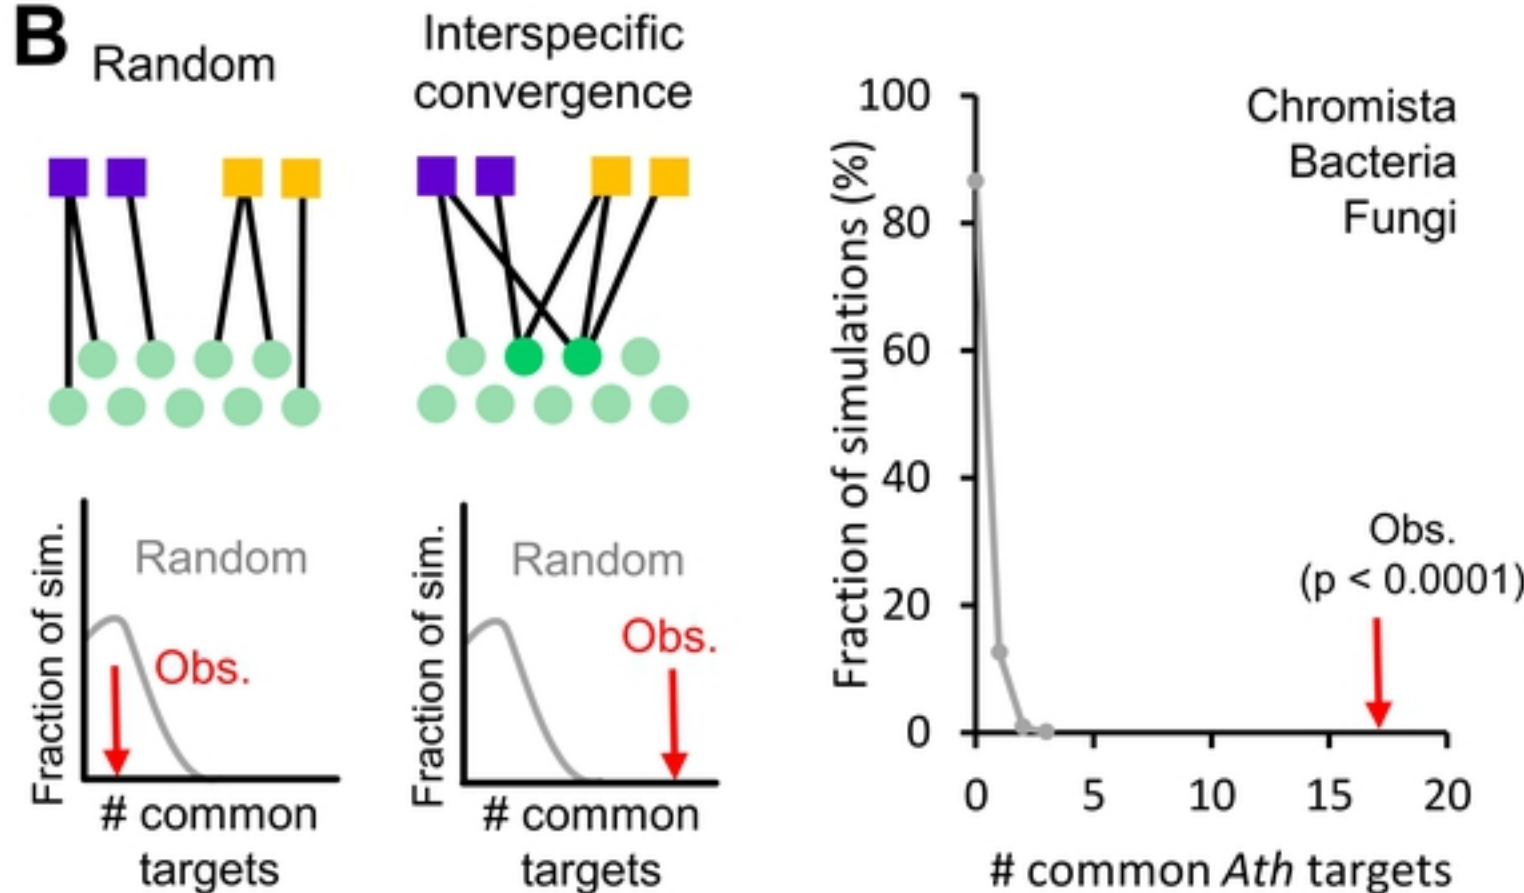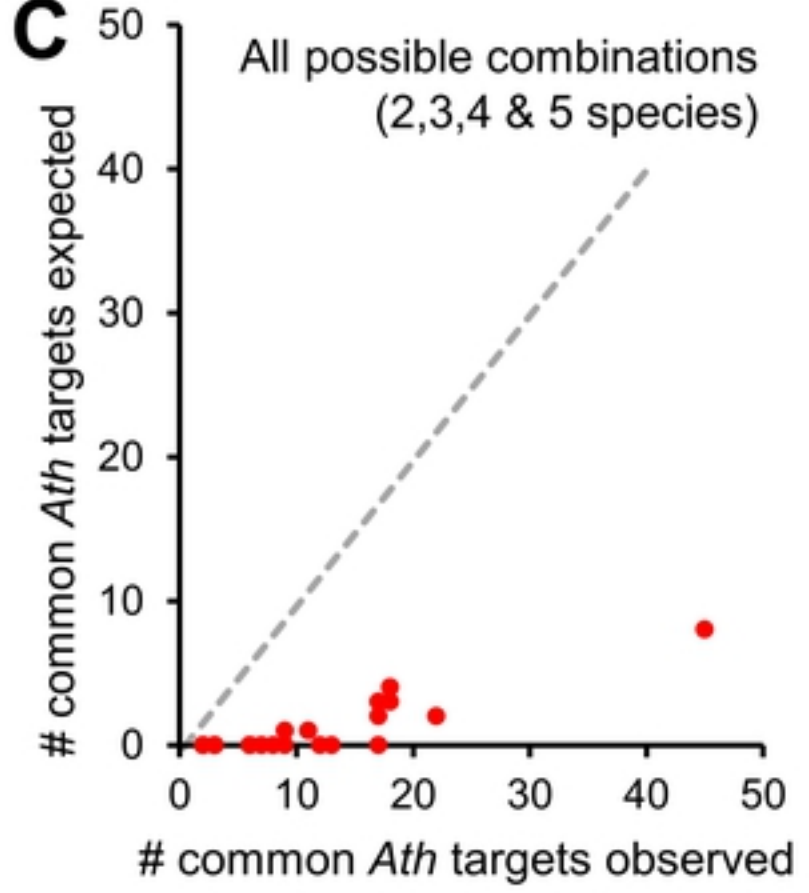

Figure2

Large-scale Y2H  
screenings performed  
in this study  
(235)

Manual curation of  
literature  
(218)

bioRxiv preprint doi: <https://doi.org/10.1101/2019.12.16.878074>; this version posted December 16, 2019. The copyright holder for this preprint (which was not certified by peer review) is the author/funder, who has granted bioRxiv a license to display the preprint in perpetuity. It is made available under aCC-BY 4.0 International license.

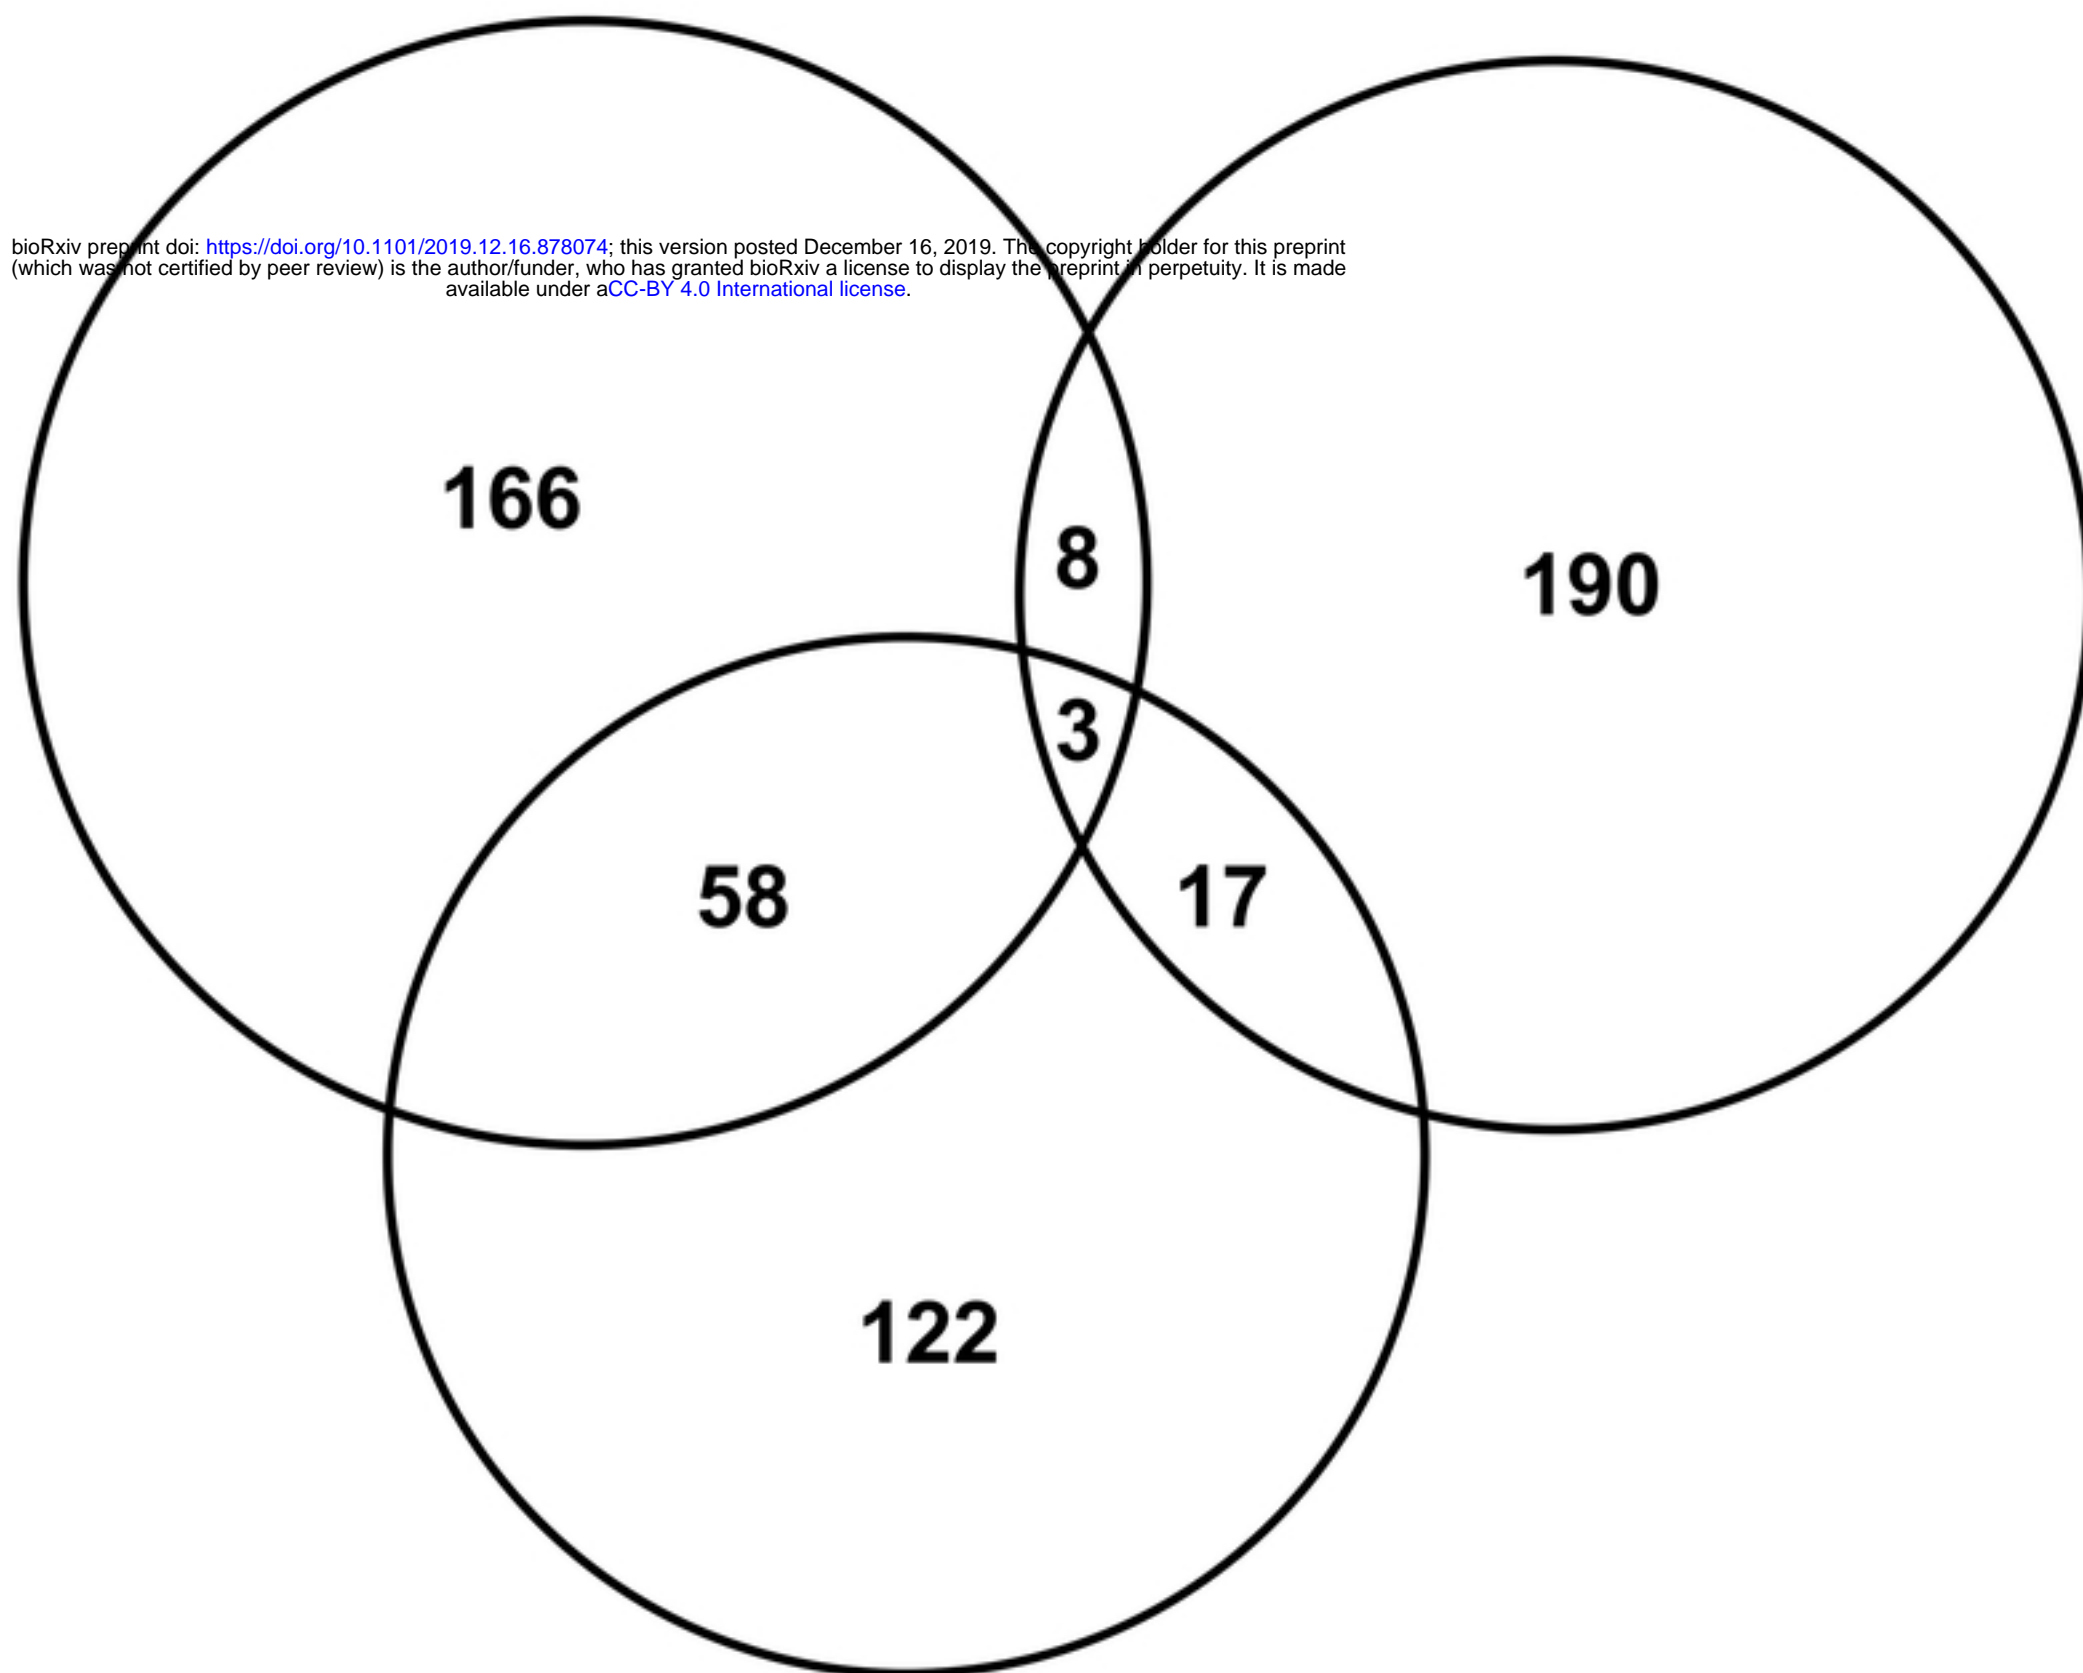

Published large-scale  
Y2H screenings  
(200)

Figure3

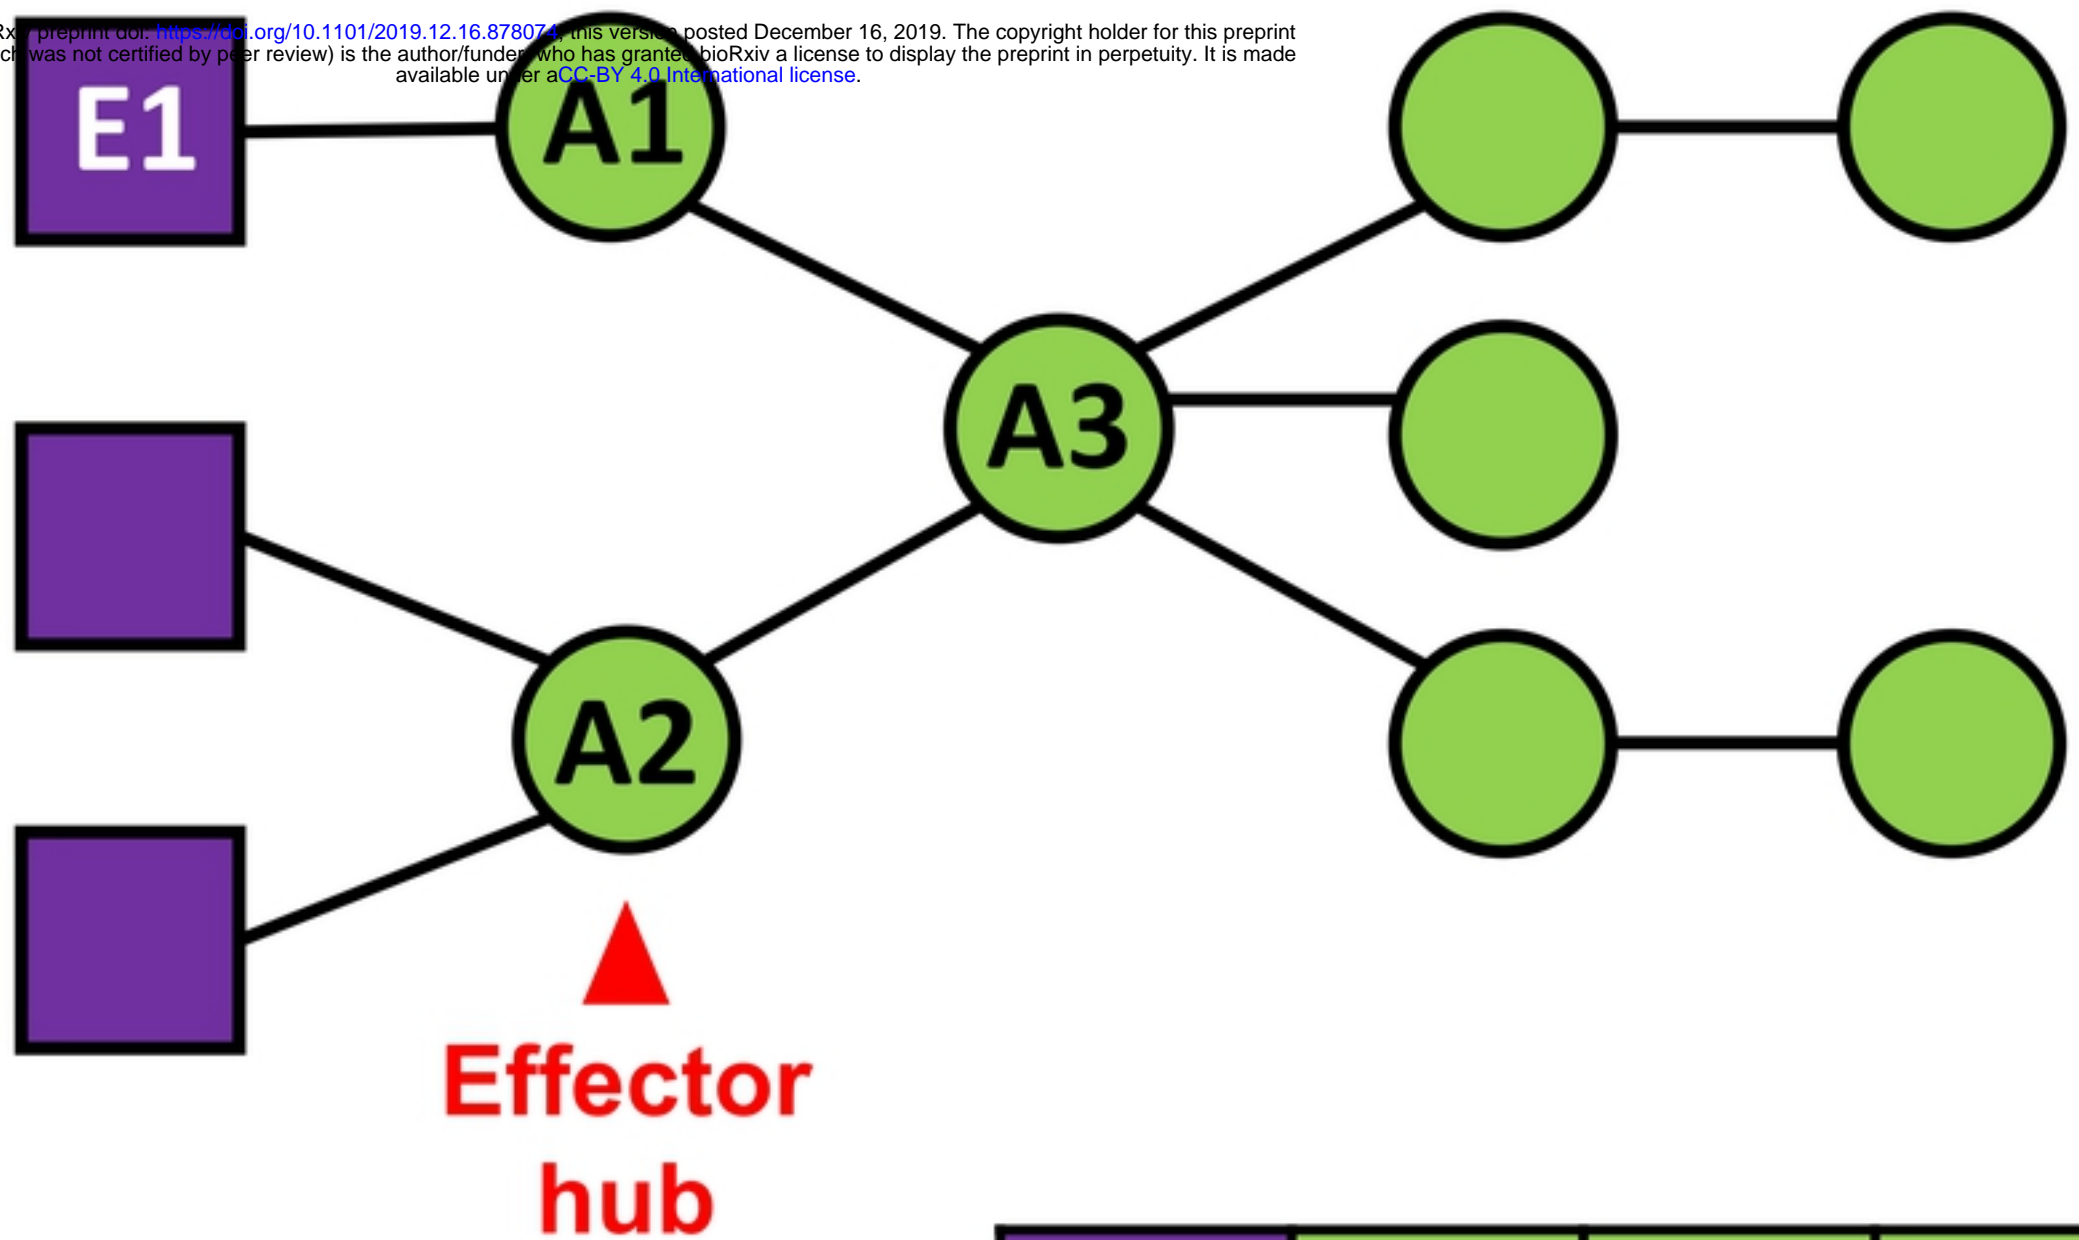

|                        | E1 | A1  | A2  | A3  |
|------------------------|----|-----|-----|-----|
| Effector degree        | -  | 1   | 1   | 0   |
| <i>Ath</i> degree      | 1  | 1   | 1   | 5   |
| Betweenness centrality | 0  | 0.2 | 0.4 | 0.9 |

Figure4

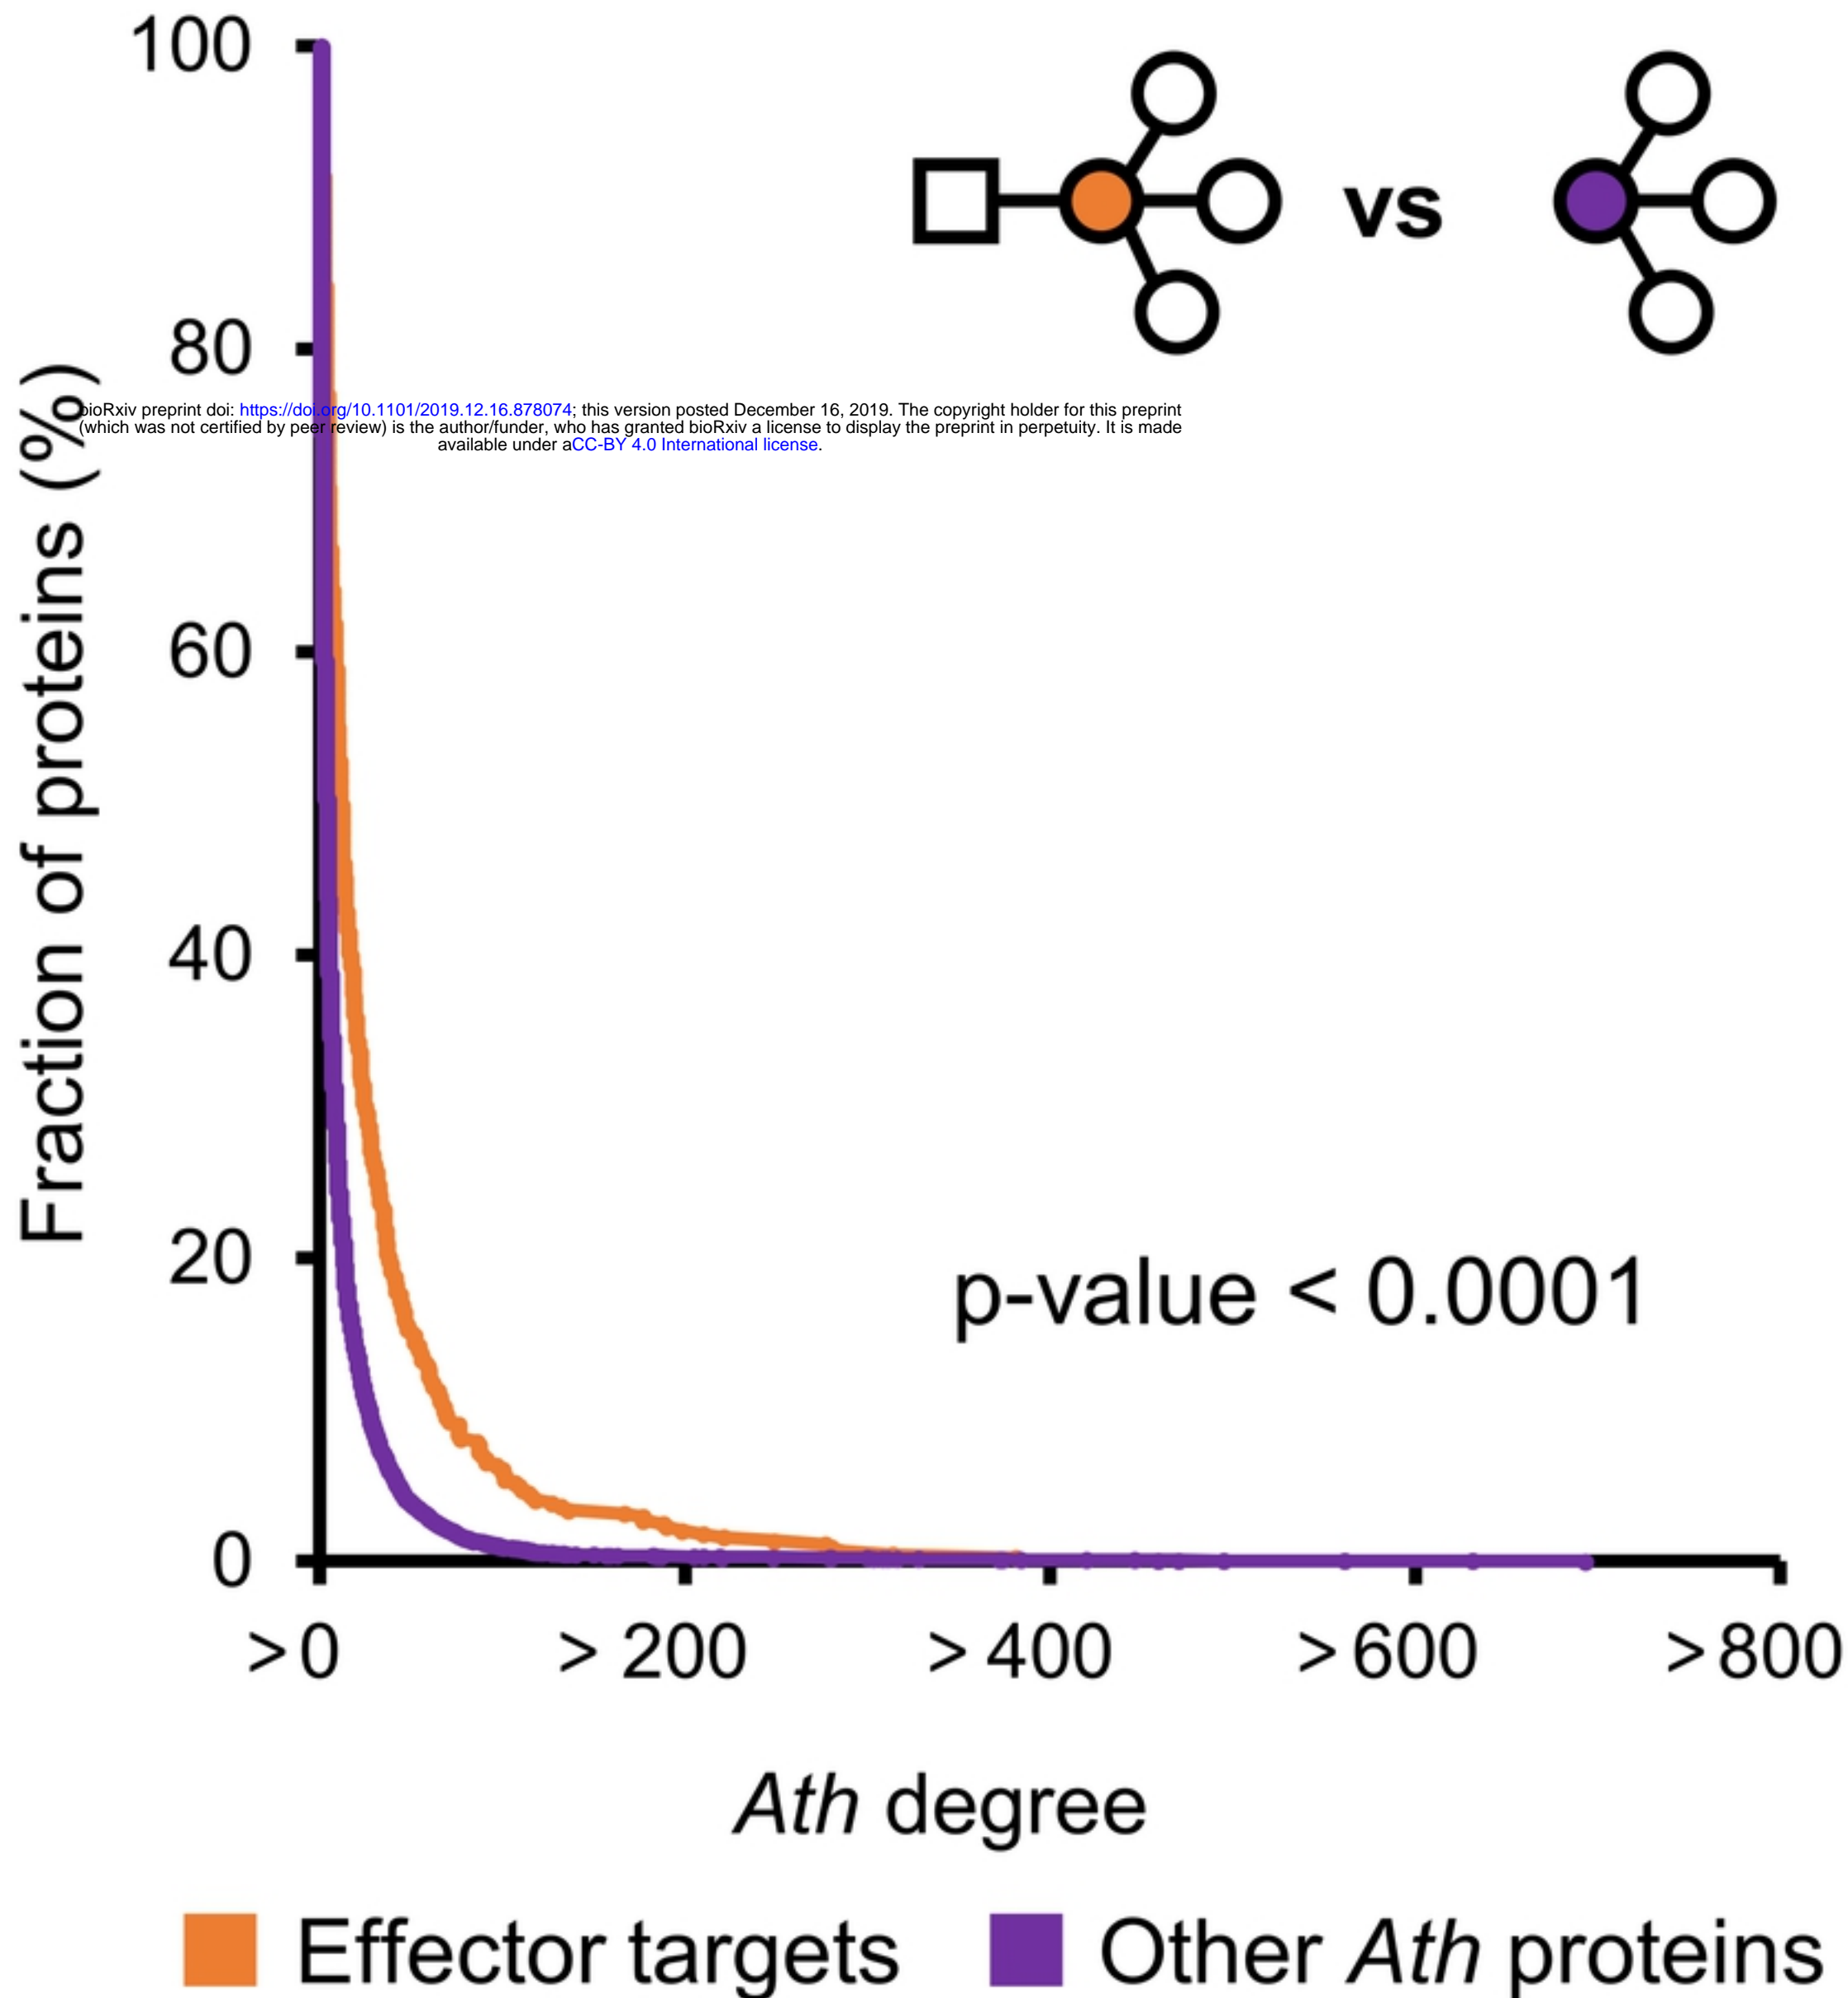

Figure5
